# Supplementary material
Source: PubMed Central journal article supplement (PMC3142471)

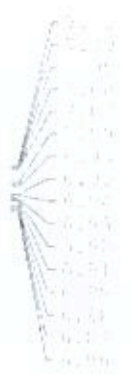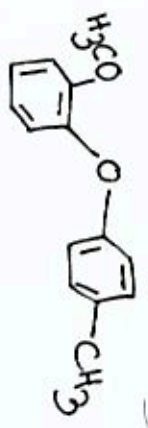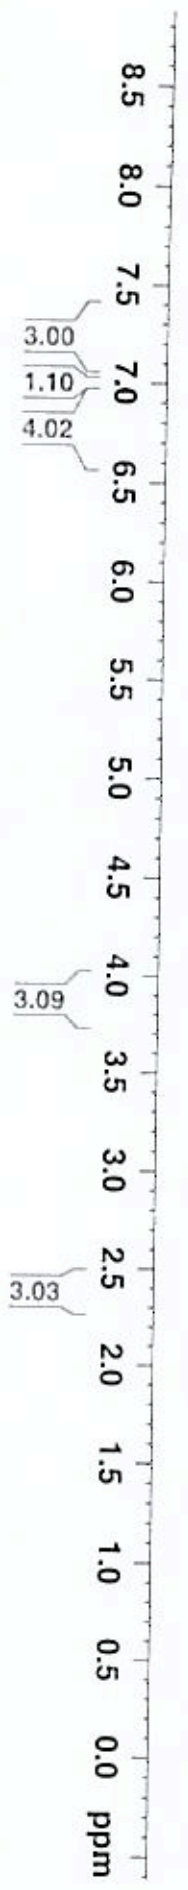

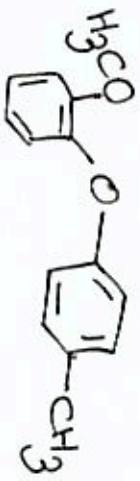

| Chemical Shift (ppm) | Integration |
|----------------------|-------------|
| 155.2                | 1.00        |
| 154.8                | 1.00        |
| 154.4                | 1.00        |
| 128.6                | 1.00        |
| 128.2                | 1.00        |
| 127.8                | 1.00        |
| 127.4                | 1.00        |
| 127.0                | 1.00        |
| 126.6                | 1.00        |
| 126.2                | 1.00        |
| 125.8                | 1.00        |
| 125.4                | 1.00        |
| 125.0                | 1.00        |
| 124.6                | 1.00        |
| 124.2                | 1.00        |
| 123.8                | 1.00        |
| 123.4                | 1.00        |
| 123.0                | 1.00        |
| 122.6                | 1.00        |
| 122.2                | 1.00        |
| 121.8                | 1.00        |
| 121.4                | 1.00        |
| 121.0                | 1.00        |
| 120.6                | 1.00        |
| 120.2                | 1.00        |
| 119.8                | 1.00        |
| 119.4                | 1.00        |
| 119.0                | 1.00        |
| 118.6                | 1.00        |
| 118.2                | 1.00        |
| 117.8                | 1.00        |
| 117.4                | 1.00        |
| 117.0                | 1.00        |
| 116.6                | 1.00        |
| 116.2                | 1.00        |
| 115.8                | 1.00        |
| 115.4                | 1.00        |
| 115.0                | 1.00        |
| 114.6                | 1.00        |
| 114.2                | 1.00        |
| 113.8                | 1.00        |
| 113.4                | 1.00        |
| 113.0                | 1.00        |
| 112.6                | 1.00        |
| 112.2                | 1.00        |
| 111.8                | 1.00        |
| 111.4                | 1.00        |
| 111.0                | 1.00        |
| 110.6                | 1.00        |
| 110.2                | 1.00        |
| 109.8                | 1.00        |
| 109.4                | 1.00        |
| 109.0                | 1.00        |
| 108.6                | 1.00        |
| 108.2                | 1.00        |
| 107.8                | 1.00        |
| 107.4                | 1.00        |
| 107.0                | 1.00        |
| 106.6                | 1.00        |
| 106.2                | 1.00        |
| 105.8                | 1.00        |
| 105.4                | 1.00        |
| 105.0                | 1.00        |
| 104.6                | 1.00        |
| 104.2                | 1.00        |
| 103.8                | 1.00        |
| 103.4                | 1.00        |
| 103.0                | 1.00        |
| 102.6                | 1.00        |
| 102.2                | 1.00        |
| 101.8                | 1.00        |
| 101.4                | 1.00        |
| 101.0                | 1.00        |
| 100.6                | 1.00        |
| 100.2                | 1.00        |
| 99.8                 | 1.00        |
| 99.4                 | 1.00        |
| 99.0                 | 1.00        |
| 98.6                 | 1.00        |
| 98.2                 | 1.00        |
| 97.8                 | 1.00        |
| 97.4                 | 1.00        |
| 97.0                 | 1.00        |
| 96.6                 | 1.00        |
| 96.2                 | 1.00        |
| 95.8                 | 1.00        |
| 95.4                 | 1.00        |
| 95.0                 | 1.00        |
| 94.6                 | 1.00        |
| 94.2                 | 1.00        |
| 93.8                 | 1.00        |
| 93.4                 | 1.00        |
| 93.0                 | 1.00        |
| 92.6                 | 1.00        |
| 92.2                 | 1.00        |
| 91.8                 | 1.00        |
| 91.4                 | 1.00        |
| 91.0                 | 1.00        |
| 90.6                 | 1.00        |
| 90.2                 | 1.00        |
| 89.8                 | 1.00        |
| 89.4                 | 1.00        |
| 89.0                 | 1.00        |
| 88.6                 | 1.00        |
| 88.2                 | 1.00        |
| 87.8                 | 1.00        |
| 87.4                 | 1.00        |
| 87.0                 | 1.00        |
| 86.6                 | 1.00        |
| 86.2                 | 1.00        |
| 85.8                 | 1.00        |
| 85.4                 | 1.00        |
| 85.0                 | 1.00        |
| 84.6                 | 1.00        |
| 84.2                 | 1.00        |
| 83.8                 | 1.00        |
| 83.4                 | 1.00        |
| 83.0                 | 1.00        |
| 82.6                 | 1.00        |
| 82.2                 | 1.00        |
| 81.8                 | 1.00        |
| 81.4                 | 1.00        |
| 81.0                 | 1.00        |
| 80.6                 | 1.00        |
| 80.2                 | 1.00        |
| 79.8                 | 1.00        |
| 79.4                 | 1.00        |
| 79.0                 | 1.00        |
| 78.6                 | 1.00        |
| 78.2                 | 1.00        |
| 77.8                 | 1.00        |
| 77.4                 | 1.00        |
| 77.0                 | 1.00        |
| 76.6                 | 1.00        |
| 76.2                 | 1.00        |
| 75.8                 | 1.00        |
| 75.4                 | 1.00        |
| 75.0                 | 1.00        |
| 74.6                 | 1.00        |
| 74.2                 | 1.00        |
| 73.8                 | 1.00        |
| 73.4                 | 1.00        |
| 73.0                 | 1.00        |
| 72.6                 | 1.00        |
| 72.2                 | 1.00        |
| 71.8                 | 1.00        |
| 71.4                 | 1.00        |
| 71.0                 | 1.00        |
| 70.6                 | 1.00        |
| 70.2                 | 1.00        |
| 69.8                 | 1.00        |
| 69.4                 | 1.00        |
| 69.0                 | 1.00        |
| 68.6                 | 1.00        |
| 68.2                 | 1.00        |
| 67.8                 | 1.00        |
| 67.4                 | 1.00        |
| 67.0                 | 1.00        |
| 66.6                 | 1.00        |
| 66.2                 | 1.00        |
| 65.8                 | 1.00        |
| 65.4                 | 1.00        |
| 65.0                 | 1.00        |
| 64.6                 | 1.00        |
| 64.2                 | 1.00        |
| 63.8                 | 1.00        |
| 63.4                 | 1.00        |
| 63.0                 | 1.00        |
| 62.6                 | 1.00        |
| 62.2                 | 1.00        |
| 61.8                 | 1.00        |
| 61.4                 | 1.00        |
| 61.0                 | 1.00        |
| 60.6                 | 1.00        |
| 60.2                 | 1.00        |
| 59.8                 | 1.00        |
| 59.4                 | 1.00        |
| 59.0                 | 1.00        |
| 58.6                 | 1.00        |
| 58.2                 | 1.00        |
| 57.8                 | 1.00        |
| 57.4                 | 1.00        |
| 57.0                 | 1.00        |
| 56.6                 | 1.00        |
| 56.2                 | 1.00        |
| 55.8                 | 1.00        |
| 55.4                 | 1.00        |
| 55.0                 | 1.00        |
| 54.6                 | 1.00        |
| 54.2                 | 1.00        |
| 53.8                 | 1.00        |
| 53.4                 | 1.00        |
| 53.0                 | 1.00        |
| 52.6                 | 1.00        |
| 52.2                 | 1.00        |
| 51.8                 | 1.00        |
| 51.4                 | 1.00        |
| 51.0                 | 1.00        |
| 50.6                 | 1.00        |
| 50.2                 | 1.00        |
| 49.8                 | 1.00        |
| 49.4                 | 1.00        |
| 49.0                 | 1.00        |
| 48.6                 | 1.00        |
| 48.2                 | 1.00        |
| 47.8                 | 1.00        |
| 47.4                 | 1.00        |
| 47.0                 | 1.00        |
| 46.6                 | 1.00        |
| 46.2                 | 1.00        |
| 45.8                 | 1.00        |
| 45.4                 | 1.00        |
| 45.0                 | 1.00        |
| 44.6                 | 1.00        |
| 44.2                 | 1.00        |
| 43.8                 | 1.00        |
| 43.4                 | 1.00        |
| 43.0                 | 1.00        |
| 42.6                 | 1.00        |
| 42.2                 | 1.00        |
| 41.8                 | 1.00        |
| 41.4                 | 1.00        |
| 41.0                 | 1.00        |
| 40.6                 | 1.00        |
| 40.2                 | 1.00        |
| 39.8                 | 1.00        |
| 39.4                 | 1.00        |
| 39.0                 | 1.00        |
| 38.6                 | 1.00        |
| 38.2                 | 1.00        |
| 37.8                 | 1.00        |
| 37.4                 | 1.00        |
| 37.0                 | 1.00        |
| 36.6                 | 1.00        |
| 36.2                 | 1.00        |
| 35.8                 | 1.00        |
| 35.4                 | 1.00        |
| 35.0                 | 1.00        |
| 34.6                 | 1.00        |
| 34.2                 | 1.00        |
| 33.8                 | 1.00        |
| 33.4                 | 1.00        |
| 33.0                 | 1.00        |
| 32.6                 | 1.00        |
| 32.2                 | 1.00        |
| 31.8                 | 1.00        |
| 31.4                 | 1.00        |
| 31.0                 | 1.00        |
| 30.6                 | 1.00        |
| 30.2                 | 1.00        |
| 29.8                 | 1.00        |
| 29.4                 | 1.00        |
| 29.0                 | 1.00        |
| 28.6                 | 1.00        |
| 28.2                 | 1.00        |
| 27.8                 | 1.00        |
| 27.4                 | 1.00        |
| 27.0                 | 1.00        |
| 26.6                 | 1.00        |
| 26.2                 | 1.00        |
| 25.8                 | 1.00        |
| 25.4                 | 1.00        |
| 25.0                 | 1.00        |
| 24.6                 | 1.00        |
| 24.2                 | 1.00        |
| 23.8                 | 1.00        |
| 23.4                 | 1.00        |
| 23.0                 | 1.00        |
| 22.6                 | 1.00        |
| 22.2                 | 1.00        |
| 21.8                 | 1.00        |
| 21.4                 | 1.00        |
| 21.0                 | 1.00        |
| 20.6                 | 1.00        |
| 20.2                 | 1.00        |
| 19.8                 | 1.00        |
| 19.4                 | 1.00        |
| 19.0                 | 1.00        |
| 18.6                 | 1.00        |
| 18.2                 | 1.00        |
| 17.8                 | 1.00        |
| 17.4                 | 1.00        |
| 17.0                 | 1.00        |
| 16.6                 | 1.00        |
| 16.2                 | 1.00        |
| 15.8                 | 1.00        |
| 15.4                 | 1.00        |
| 15.0                 | 1.00        |
| 14.6                 | 1.00        |
| 14.2                 | 1.00        |
| 13.8                 | 1.00        |
| 13.4                 | 1.00        |
| 13.0                 | 1.00        |
| 12.6                 | 1.00        |
| 12.2                 | 1.00        |
| 11.8                 | 1.00        |
| 11.4                 | 1.00        |
| 11.0                 | 1.00        |
| 10.6                 | 1.00        |
| 10.2                 | 1.00        |
| 9.8                  | 1.00        |
| 9.4                  | 1.00        |
| 9.0                  | 1.00        |
| 8.6                  | 1.00        |
| 8.2                  | 1.00        |
| 7.8                  | 1.00        |
| 7.4                  | 1.00        |
| 7.0                  | 1.00        |
| 6.6                  | 1.00        |
| 6.2                  | 1.00        |
| 5.8                  | 1.00        |
| 5.4                  | 1.00        |
| 5.0                  | 1.00        |
| 4.6                  | 1.00        |
| 4.2                  | 1.00        |
| 3.8                  | 1.00        |
| 3.4                  | 1.00        |
| 3.0                  | 1.00        |
| 2.6                  | 1.00        |
| 2.2                  | 1.00        |
| 1.8                  | 1.00        |
| 1.4                  | 1.00        |
| 1.0                  | 1.00        |
| 0.6                  | 1.00        |
| 0.2                  | 1.00        |
| -0.2                 | 1.00        |
| -0.6                 | 1.00        |
| -1.0                 | 1.00        |
| -1.4                 | 1.00        |
| -1.8                 | 1.00        |
| -2.2                 | 1.00        |
| -2.6                 | 1.00        |
| -3.0                 | 1.00        |
| -3.4                 | 1.00        |
| -3.8                 | 1.00        |
| -4.2                 | 1.00        |
| -4.6                 | 1.00        |
| -5.0                 | 1.00        |
| -5.4                 | 1.00        |
| -5.8                 | 1.00        |
| -6.2                 | 1.00        |
| -6.6                 | 1.00        |
| -7.0                 | 1.00        |
| -7.4                 | 1.00        |
| -7.8                 | 1.00        |
| -8.2                 | 1.00        |
| -8.6                 | 1.00        |
| -9.0                 | 1.00        |
| -9.4                 | 1.00        |
| -9.8                 | 1.00        |
| -10.2                | 1.00        |
| -10.6                | 1.00        |
| -11.0                | 1.00        |
| -11.4                | 1.00        |
| -11.8                | 1.00        |
| -12.2                | 1.00        |
| -12.6                | 1.00        |
| -13.0                | 1.00        |
| -13.4                | 1.00        |
| -13.8                | 1.00        |
| -14.2                | 1.00        |
| -14.6                | 1.00        |
| -15.0                | 1.00        |
| -15.4                | 1.00        |
| -15.8                | 1.00        |
| -16.2                | 1.00        |
| -16.6                | 1.00        |
| -17.0                | 1.00        |
| -17.4                | 1.00        |
| -17.8                | 1.00        |
| -18.2                | 1.00        |
| -18.6                | 1.00        |
| -19.0                | 1.00        |
| -19.4                | 1.00        |
| -19.8                | 1.00        |
| -20.2                | 1.00        |

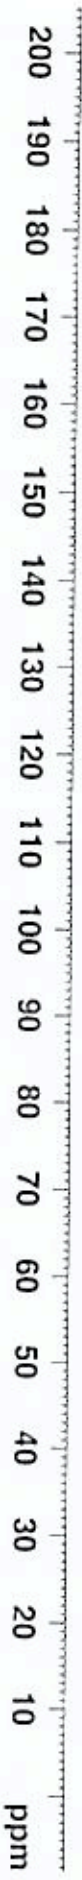

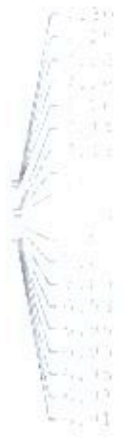

Handwritten 's' and 'f' marks.

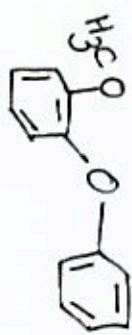

Handwritten 's' mark.

Handwritten '1' mark.

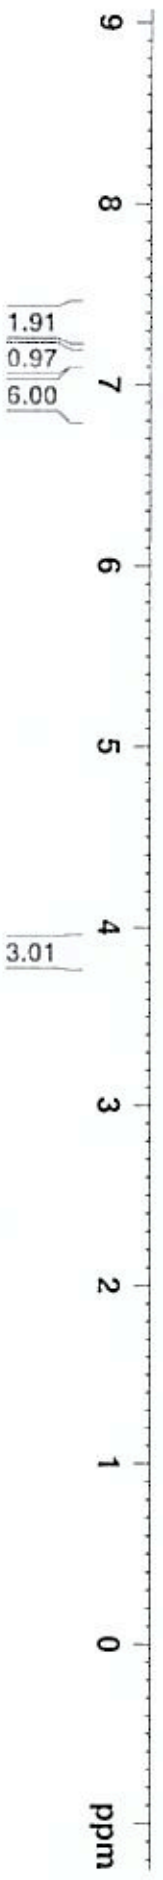

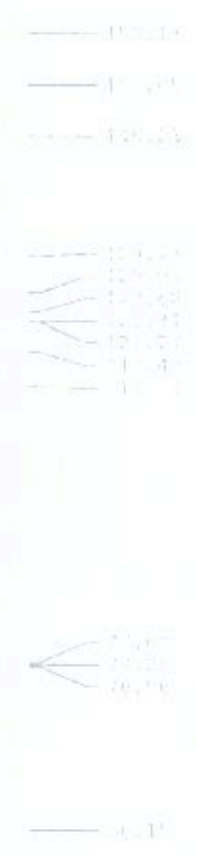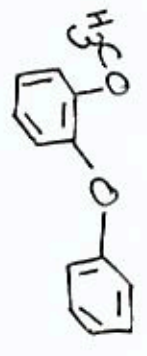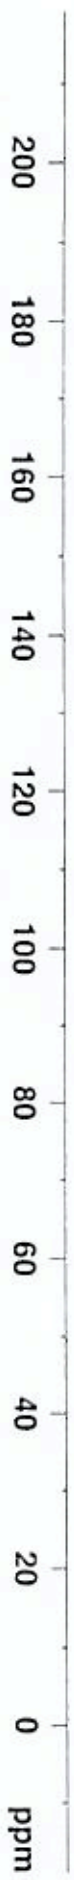

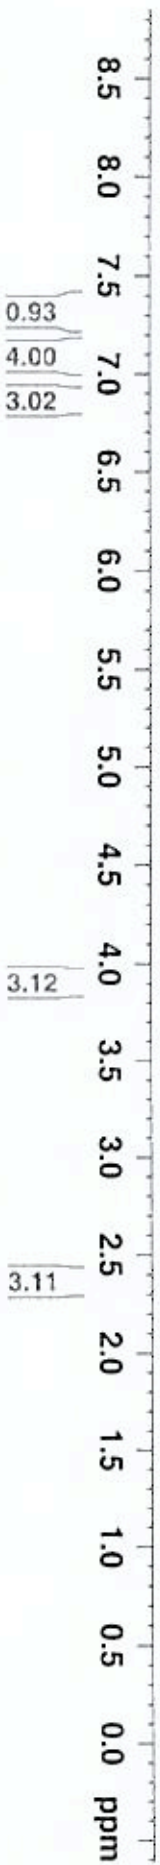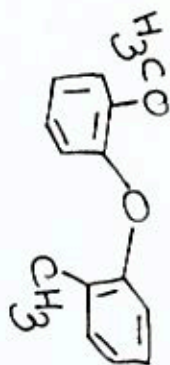

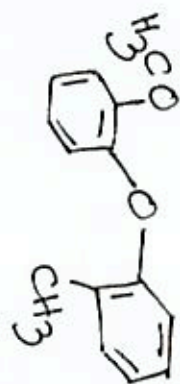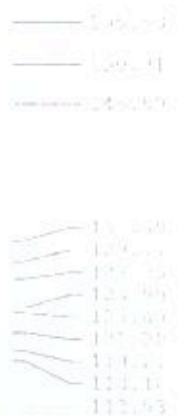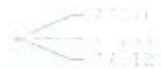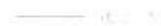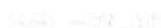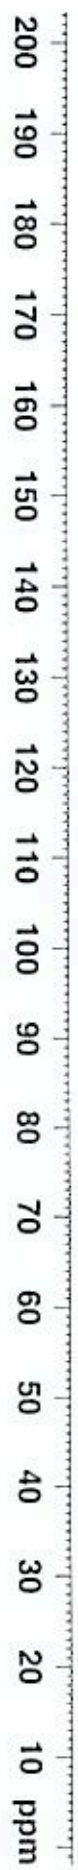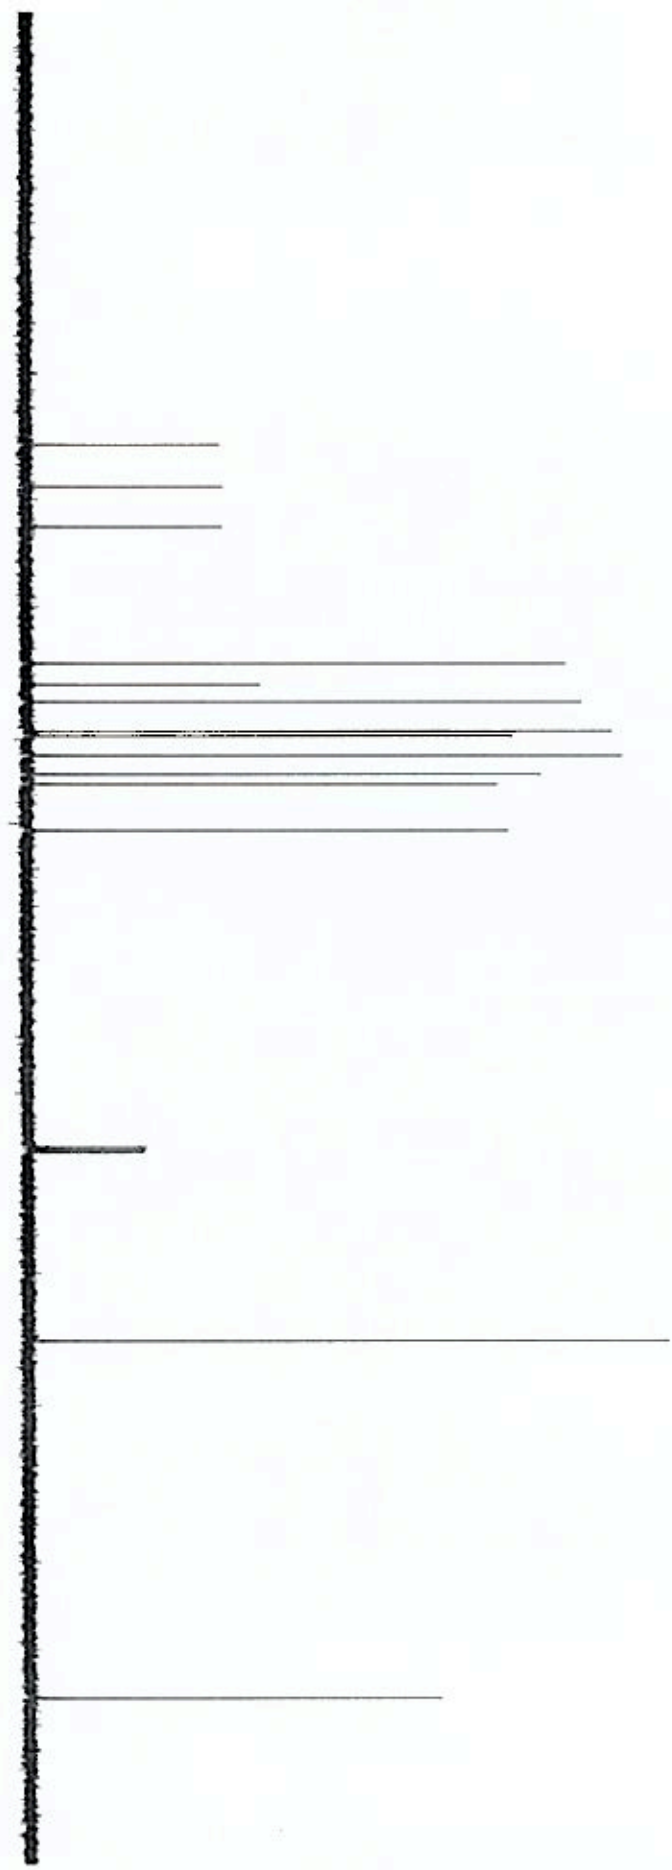

1H-dc1f parameter set

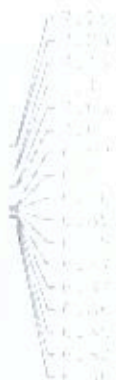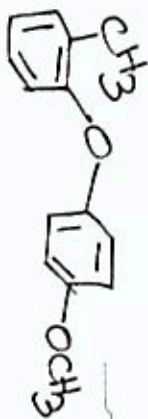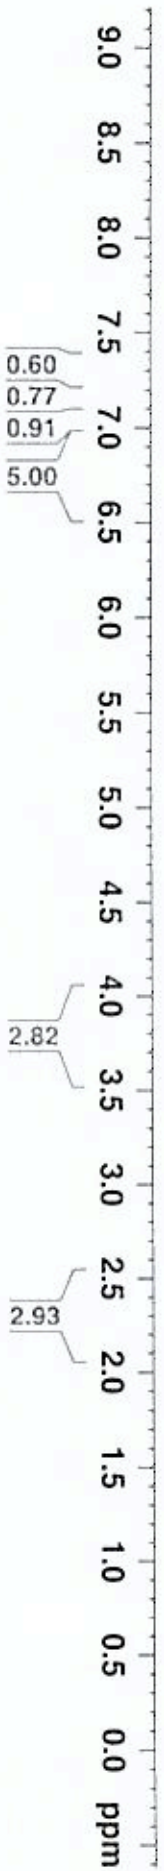

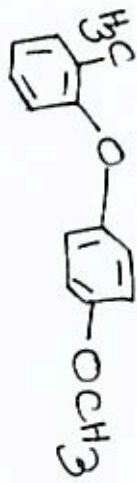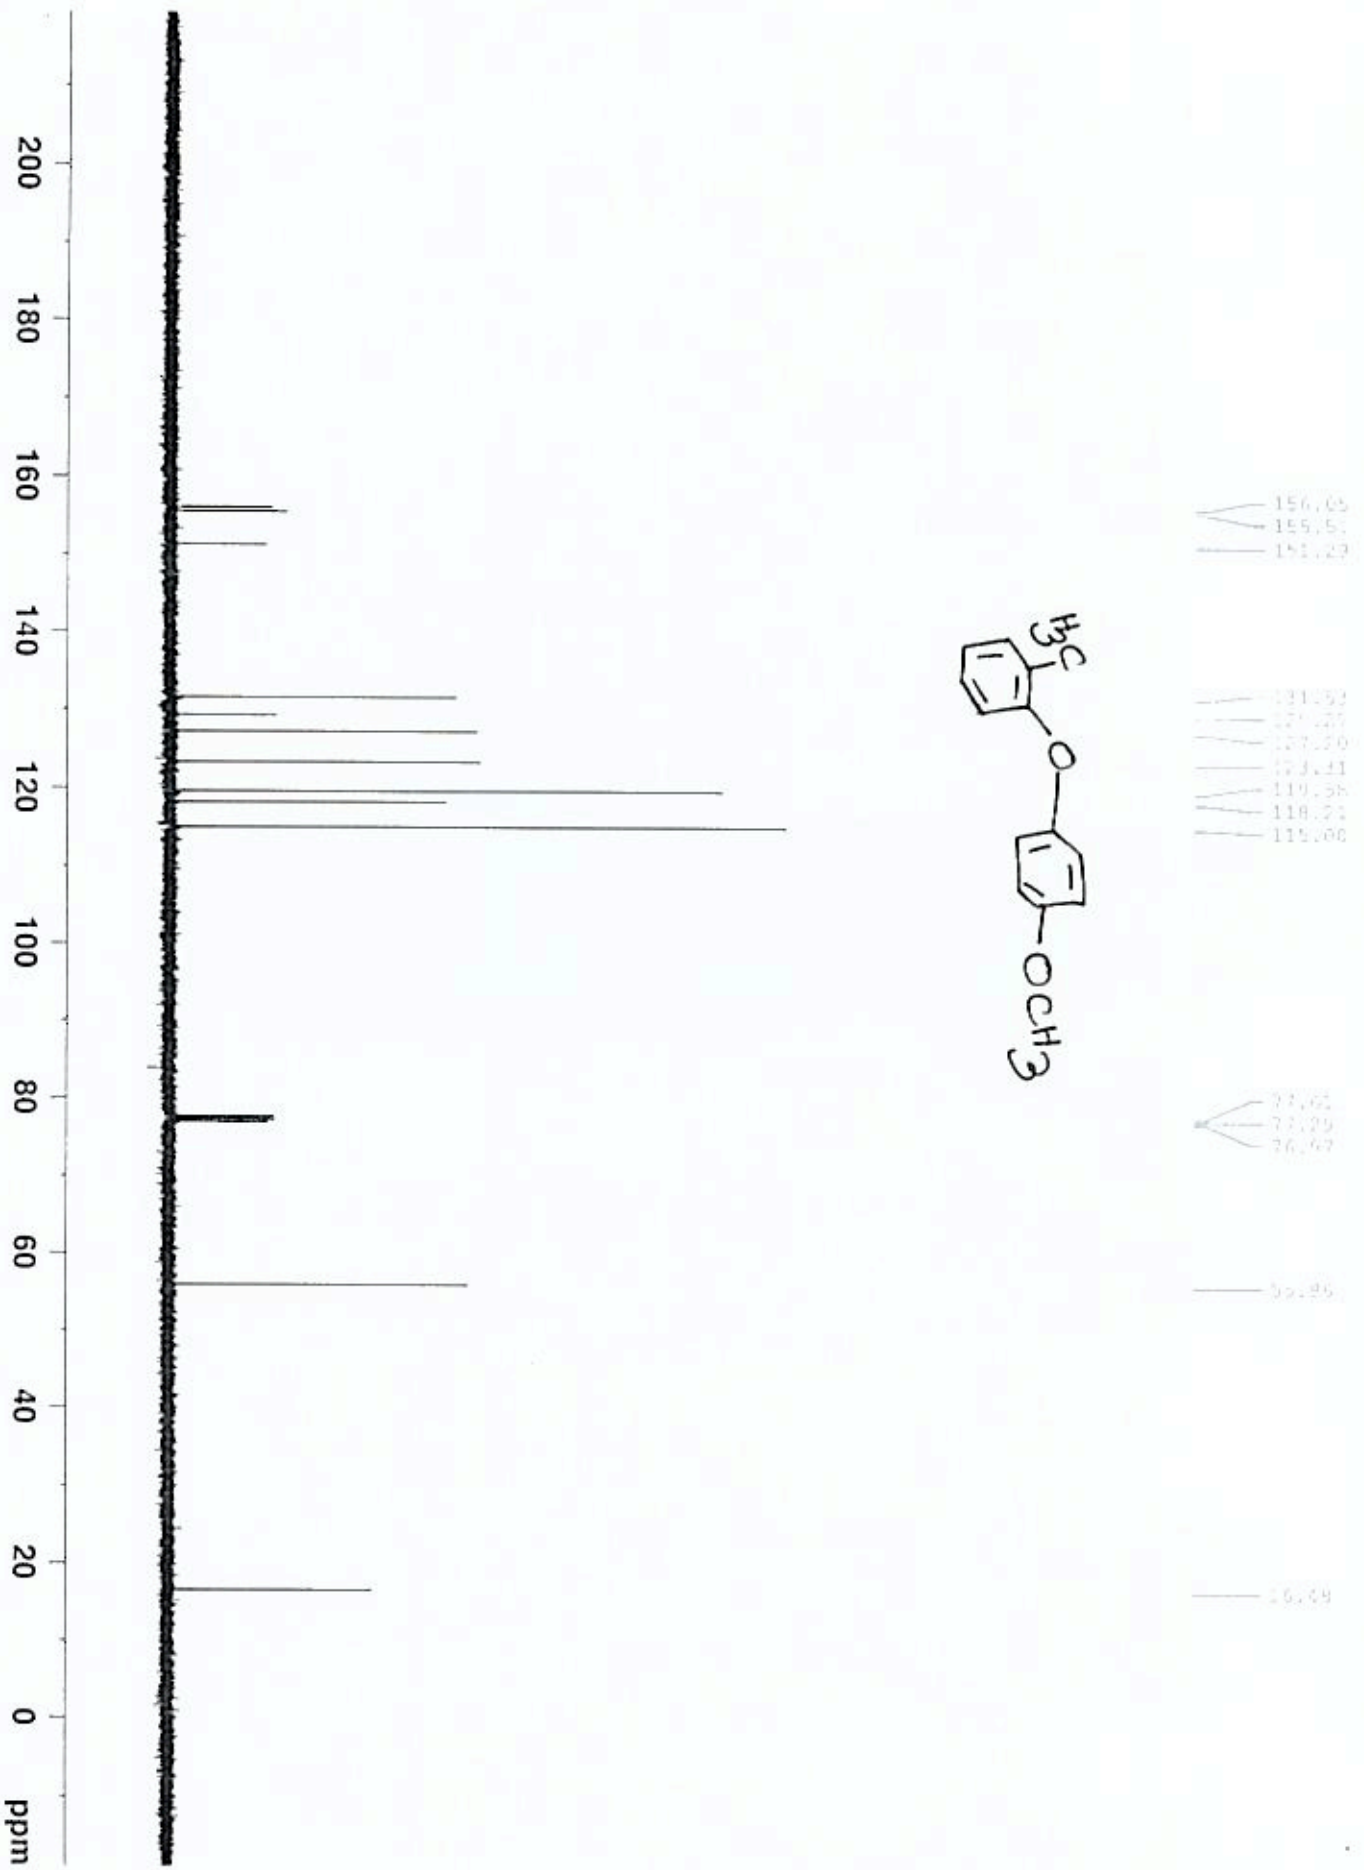



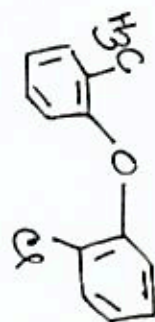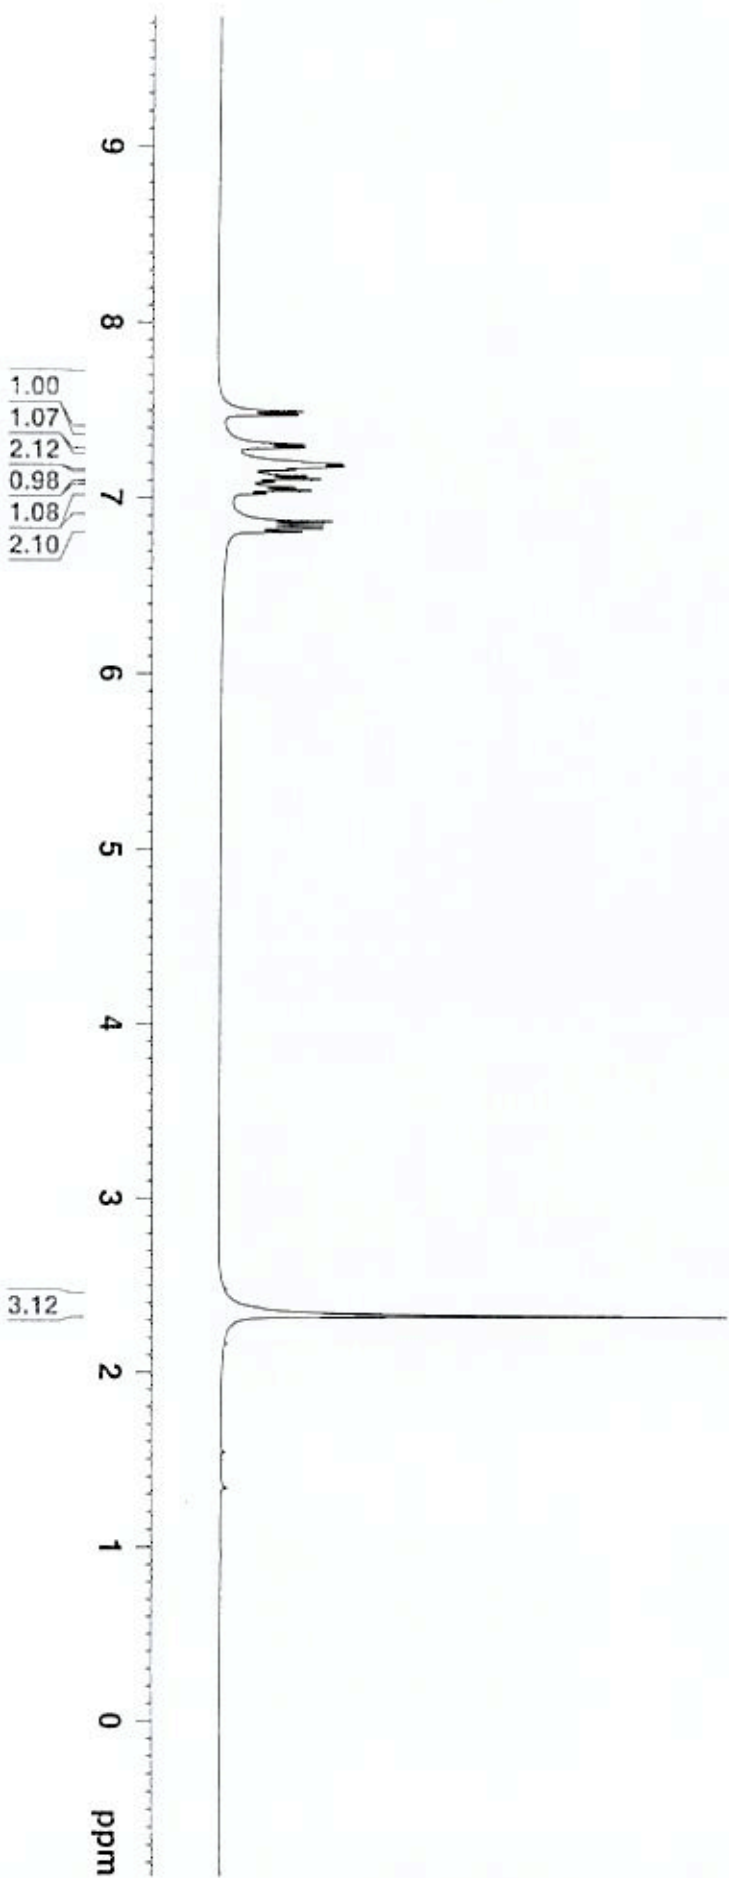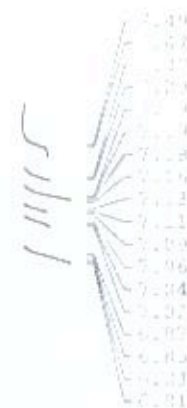

1.80

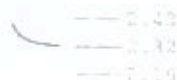

200 190 180 170 160 150 140 130 120 110 100 90 80 70 60 50 40 30 20 10 ppm

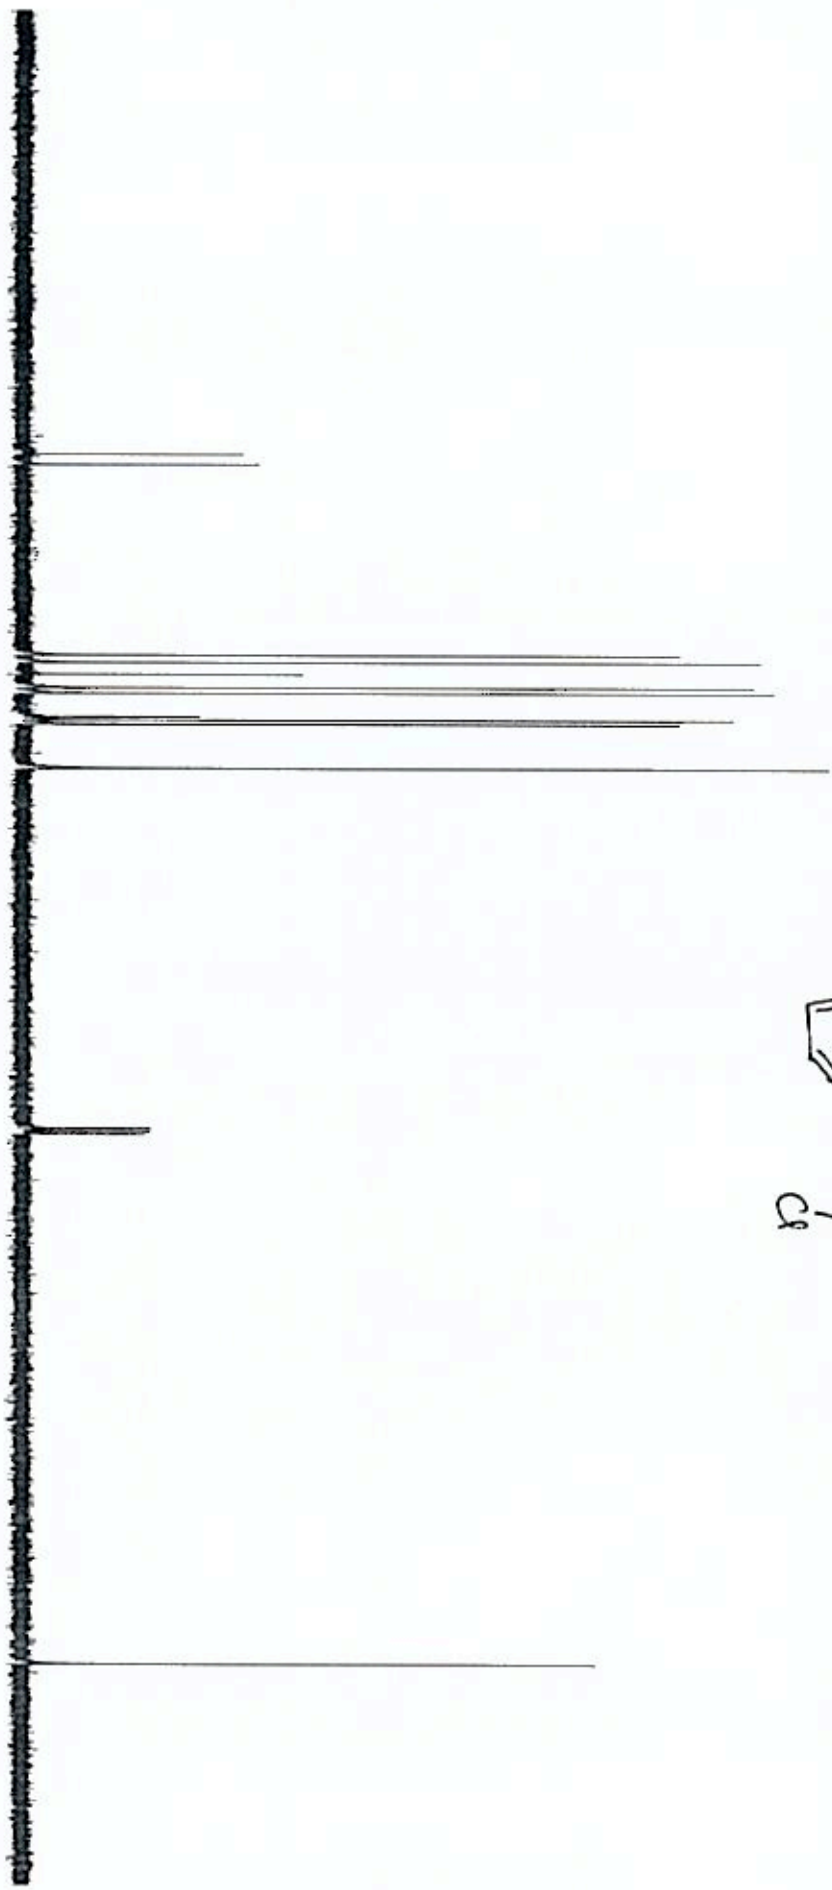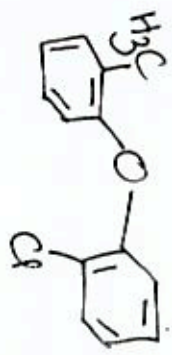

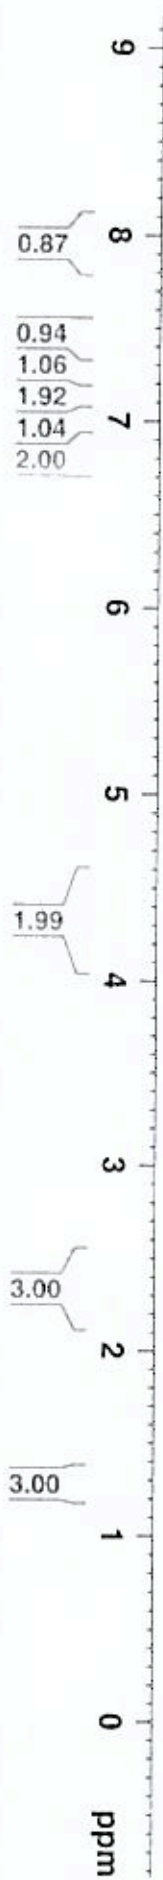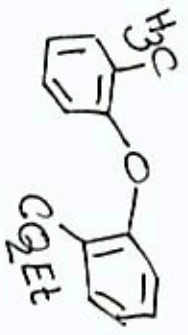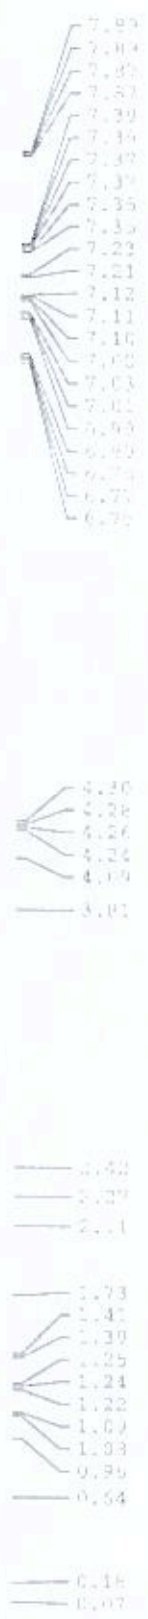

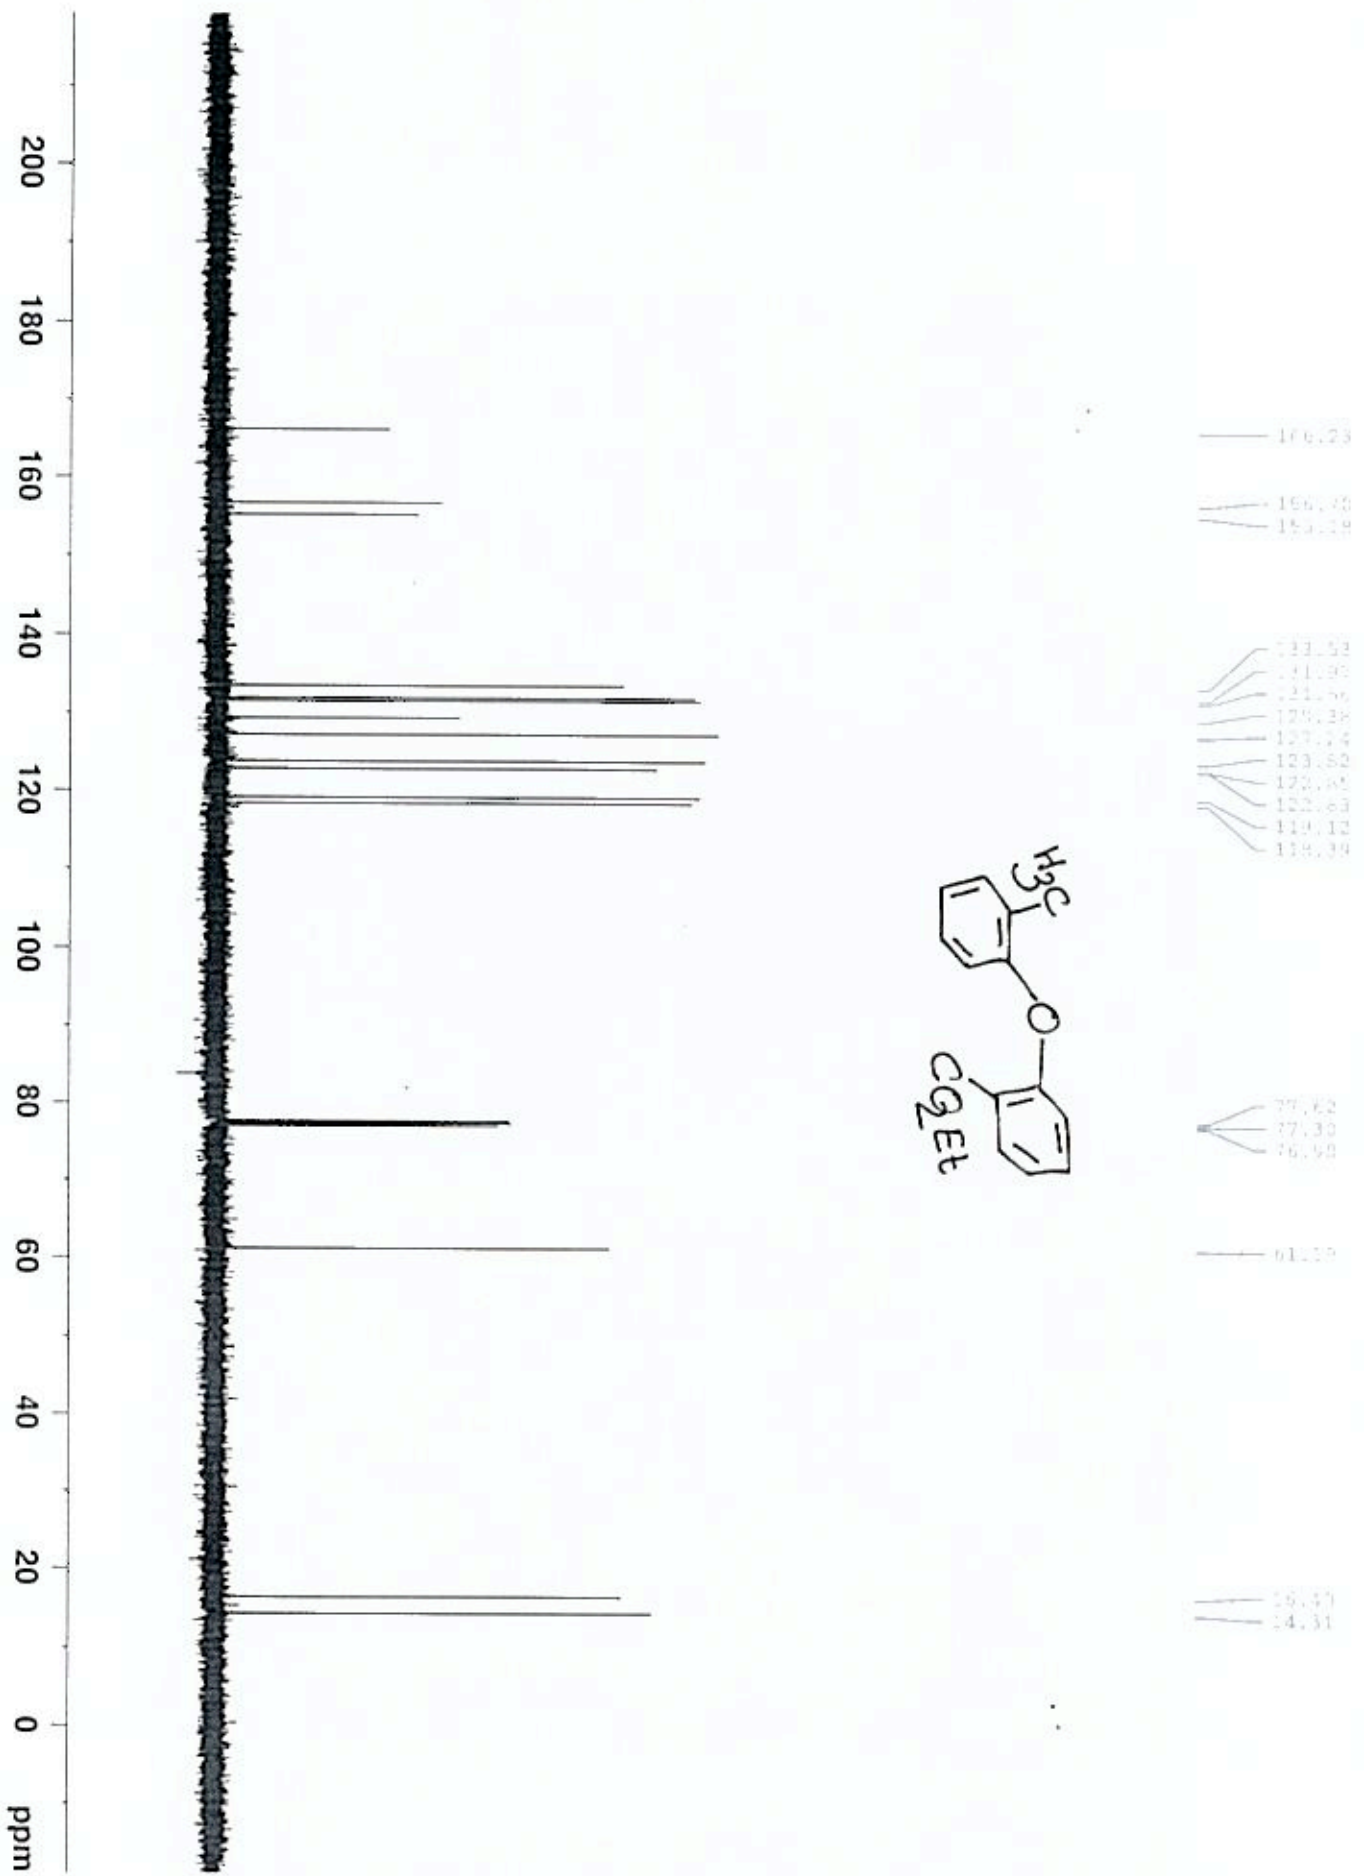

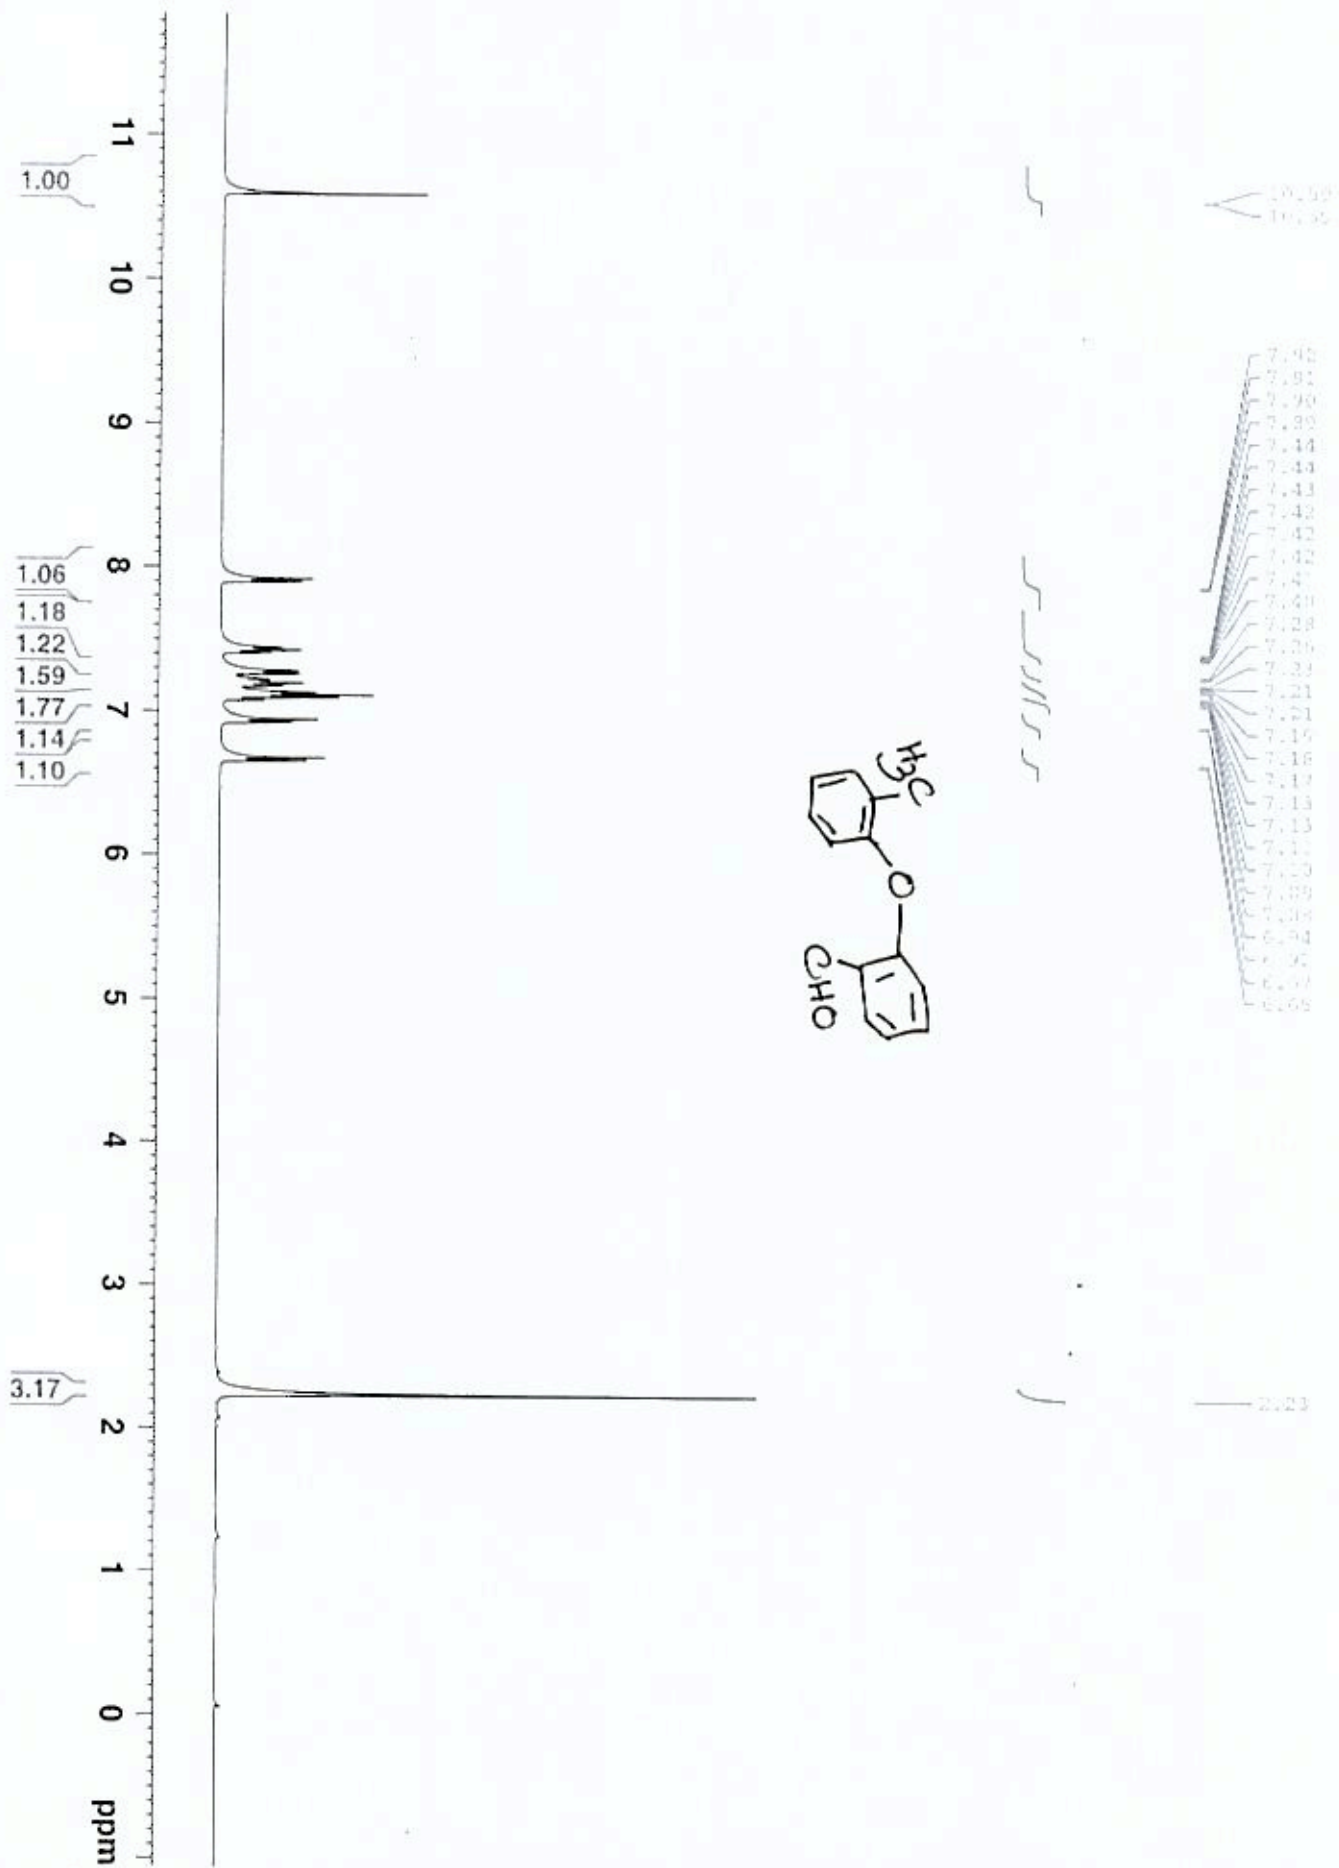

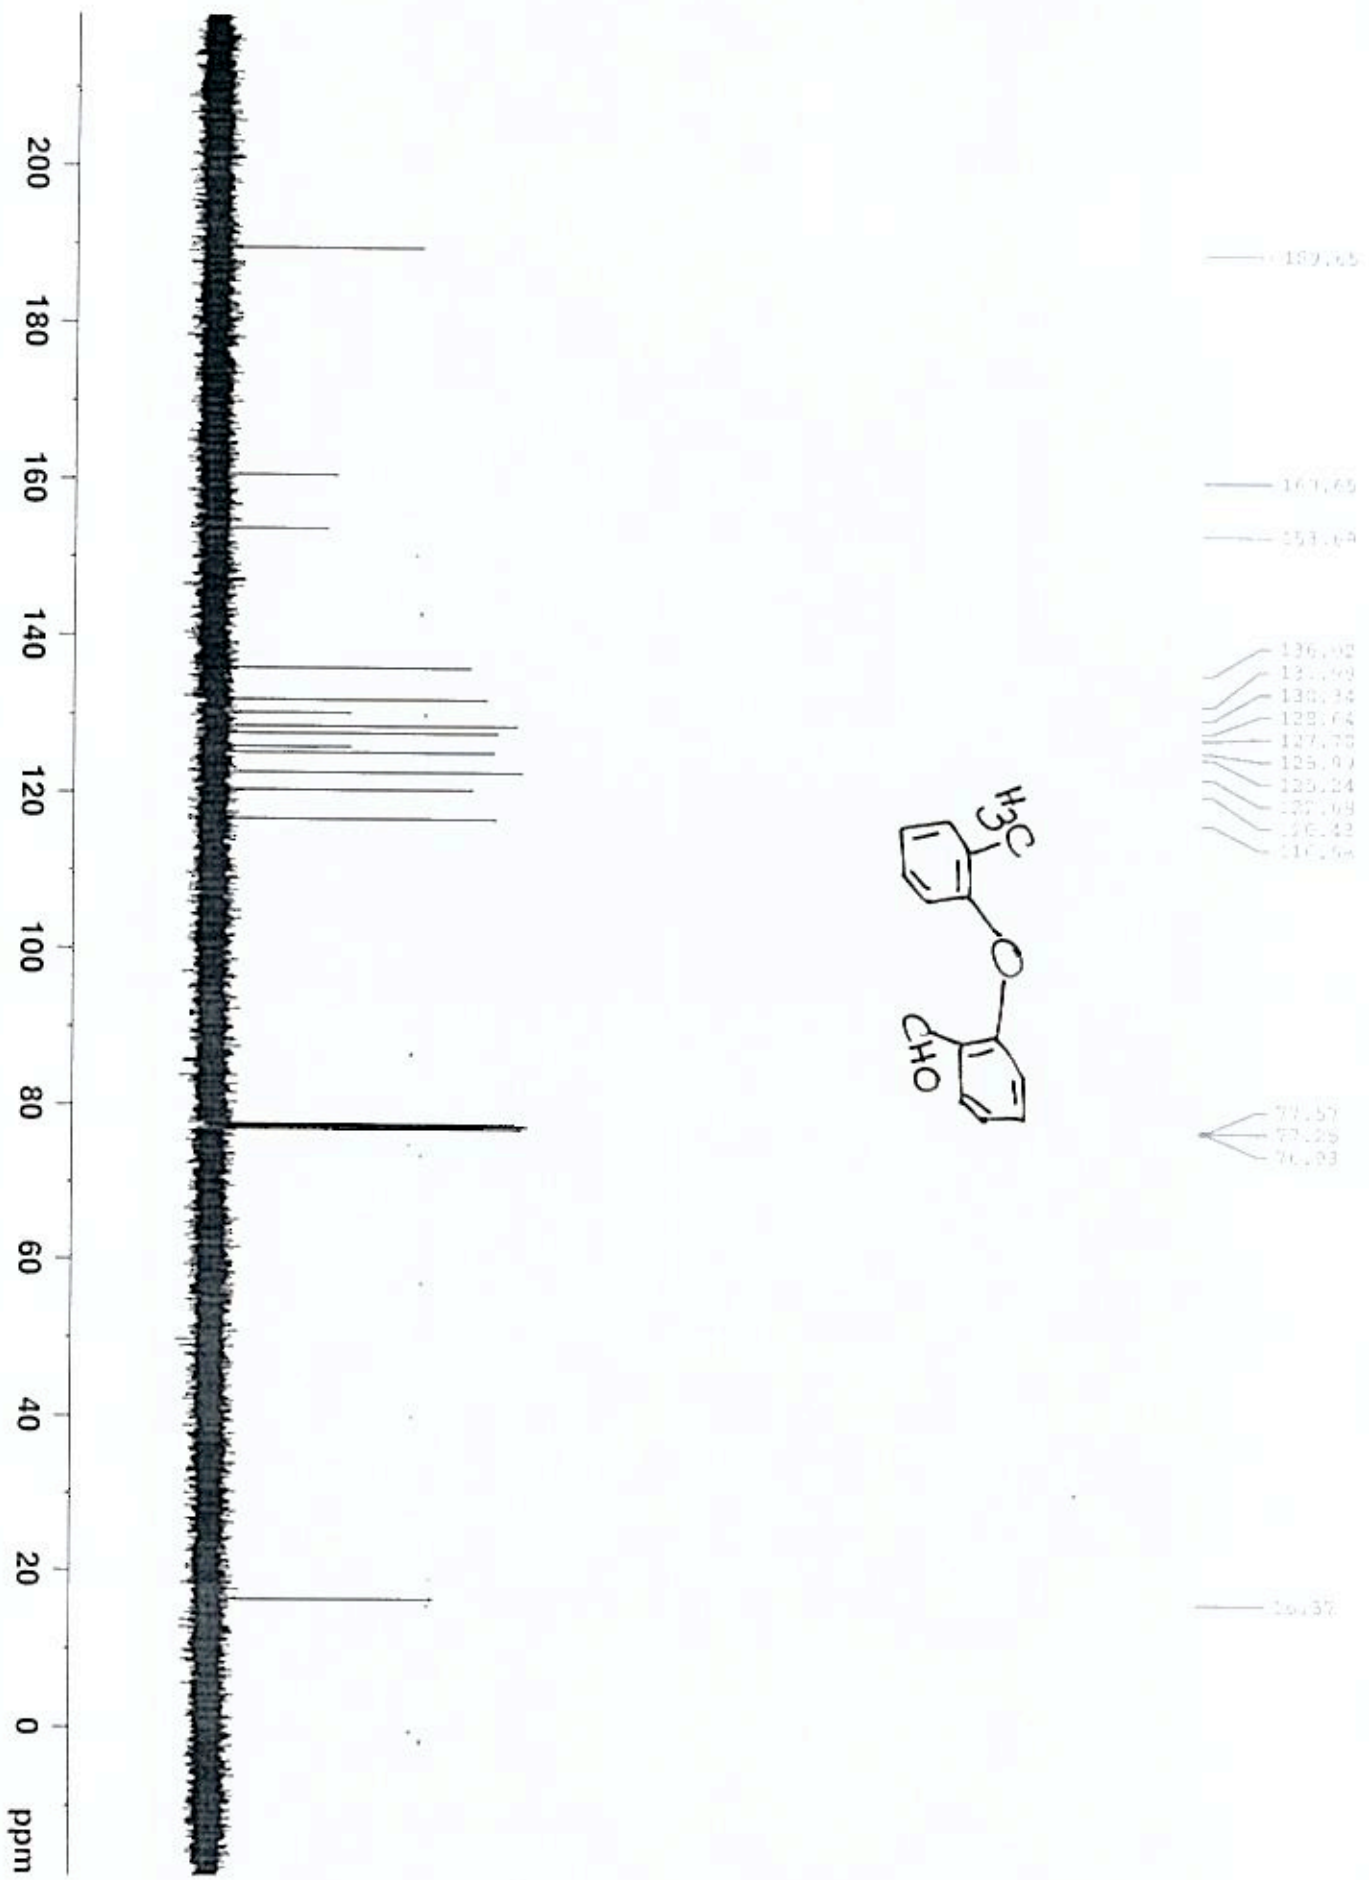



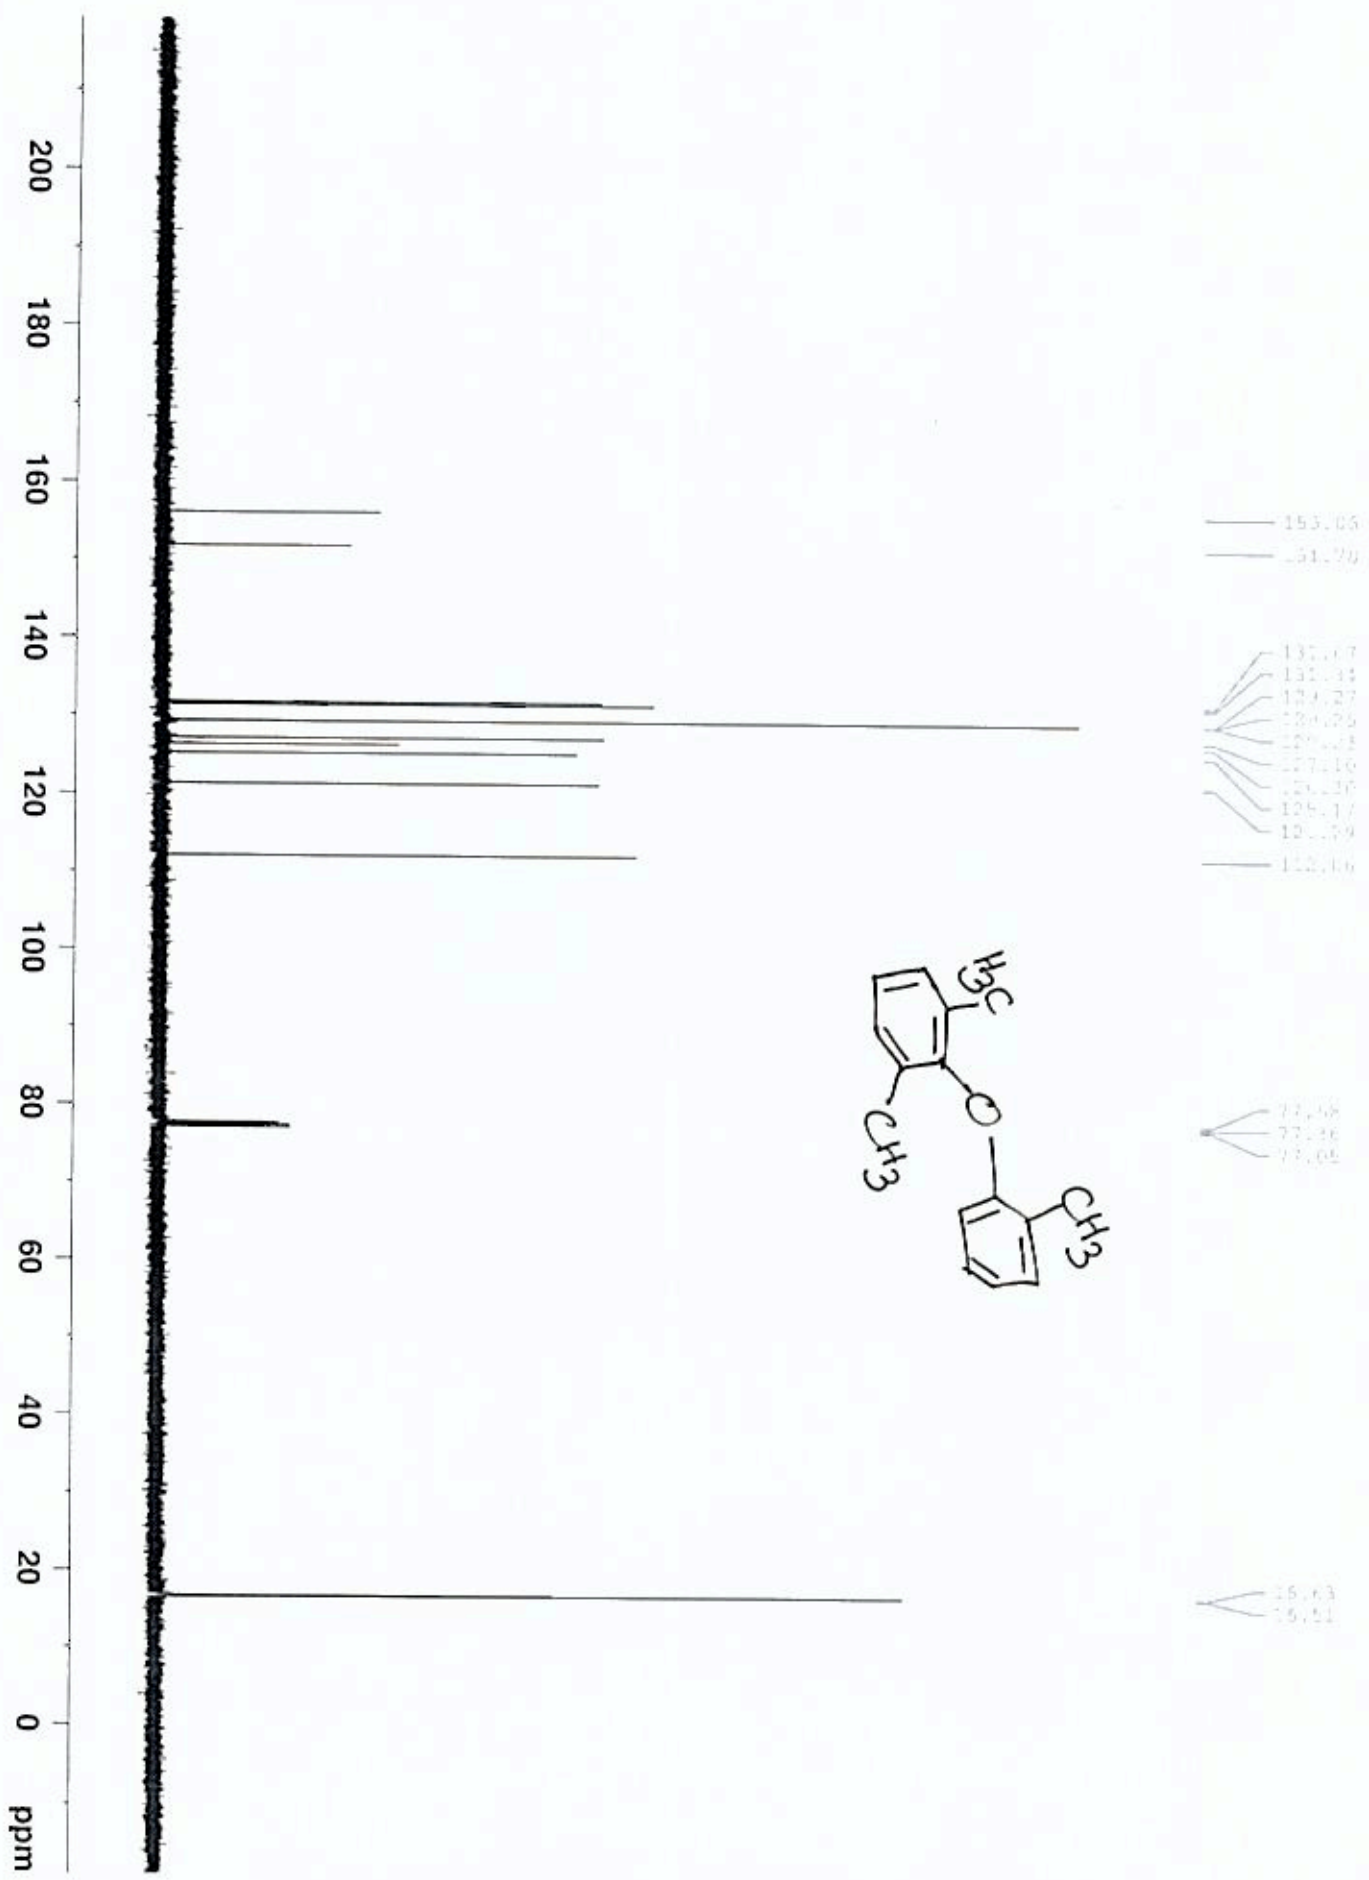



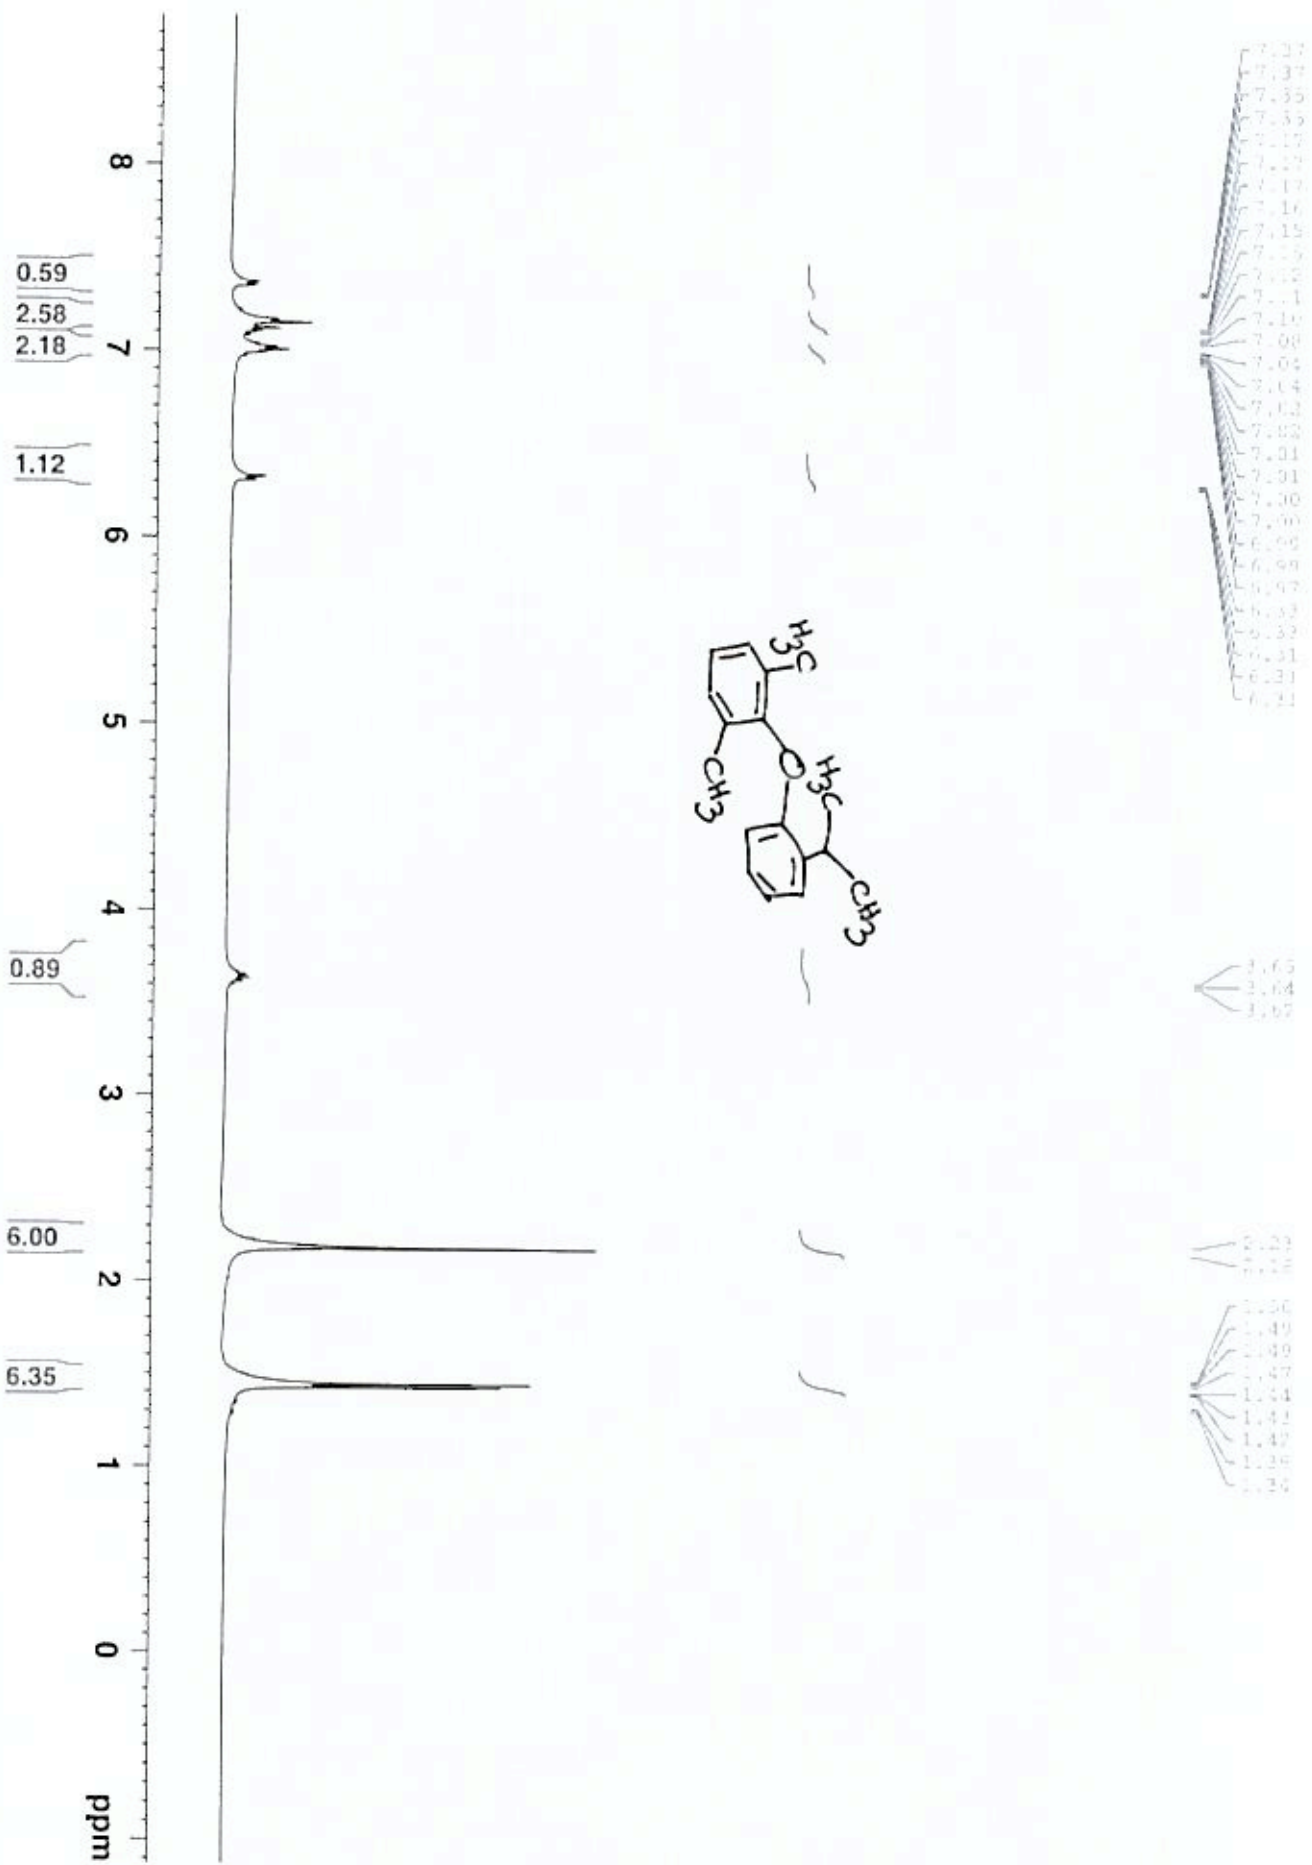

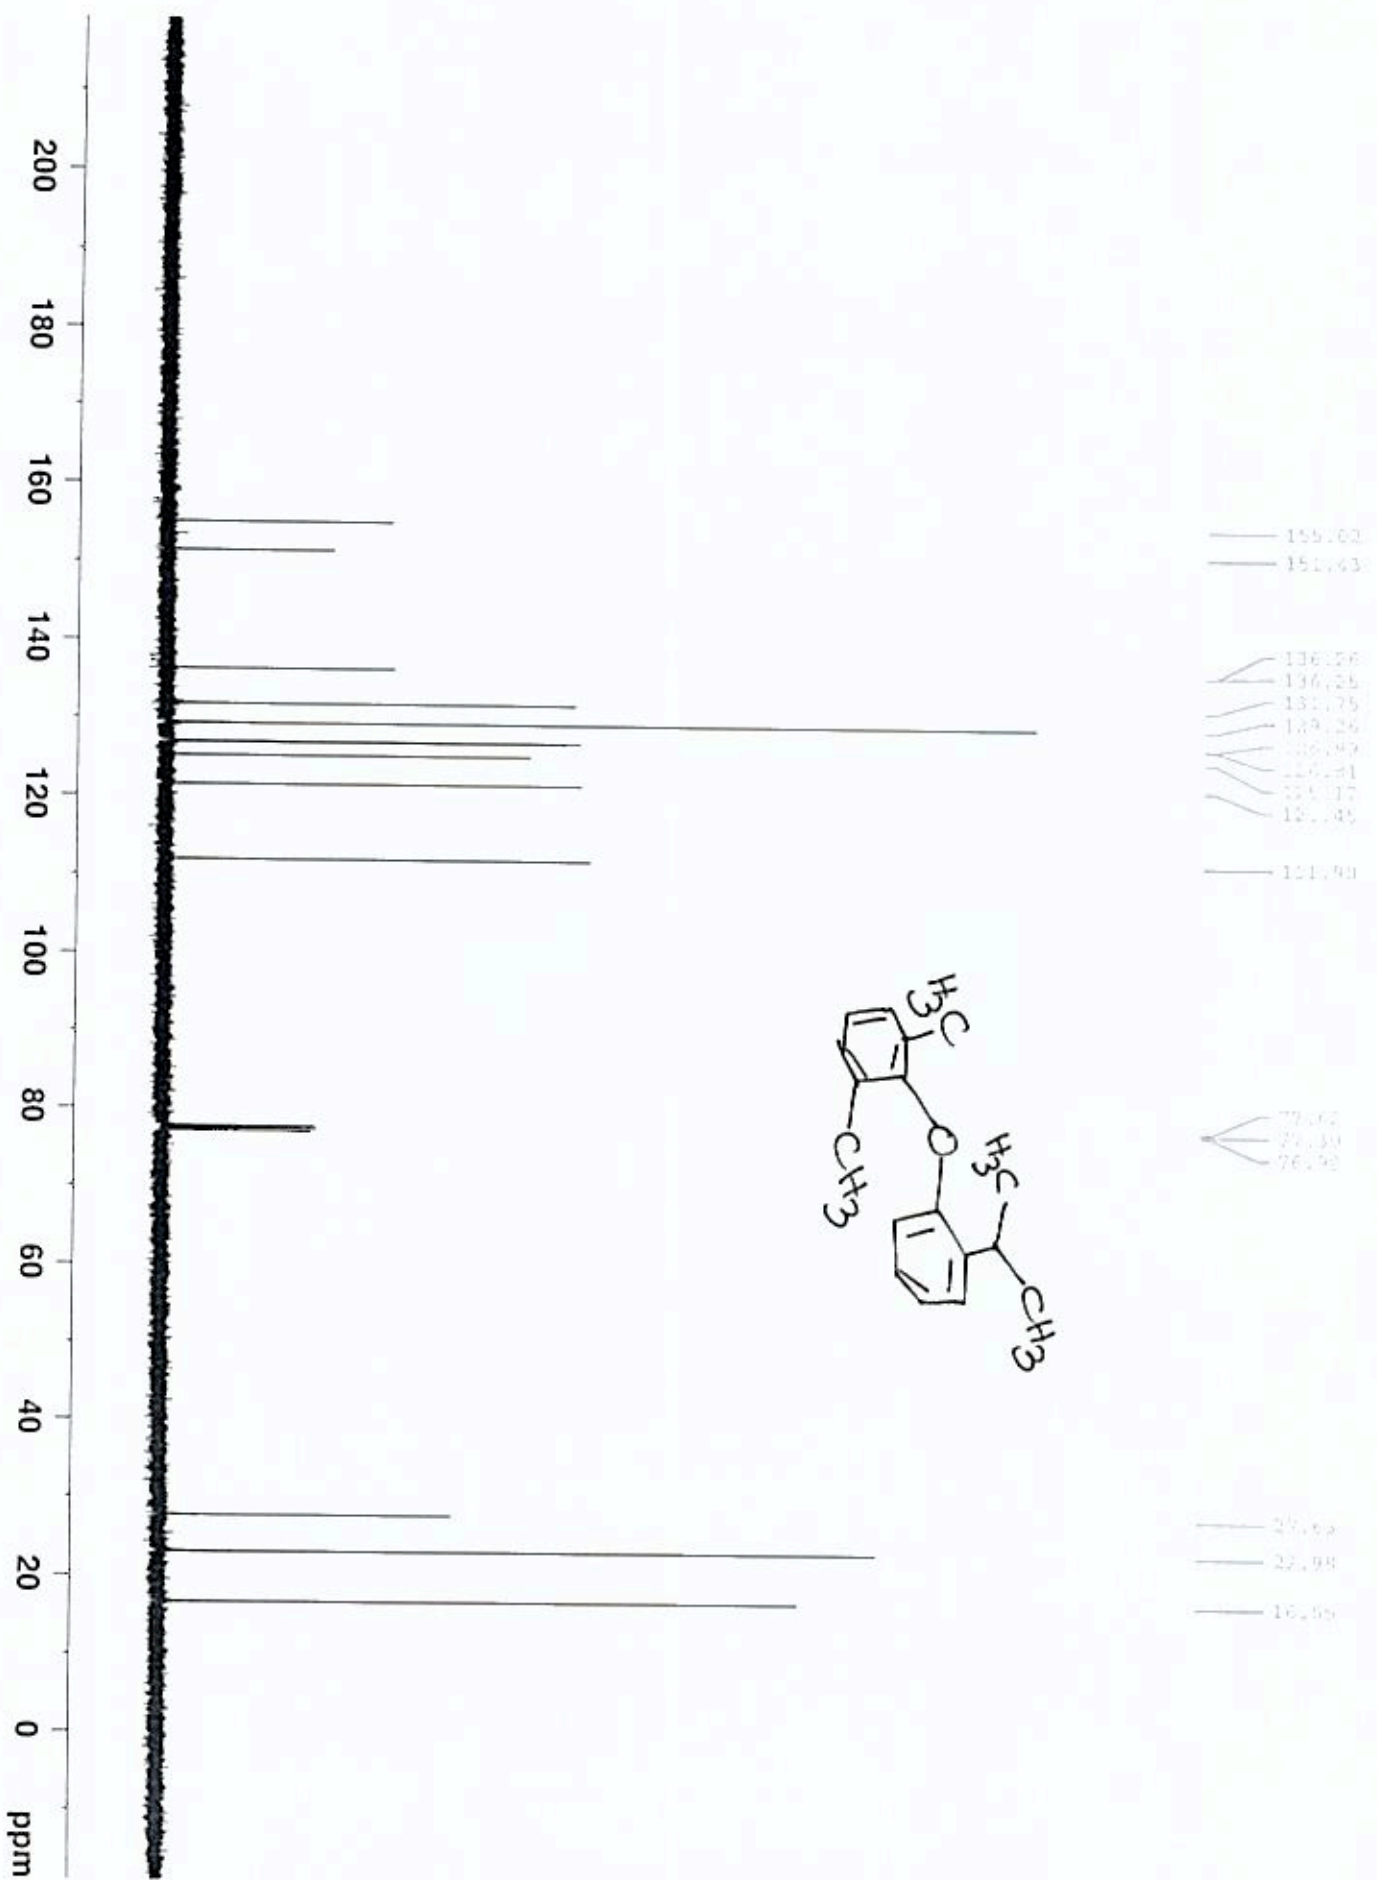

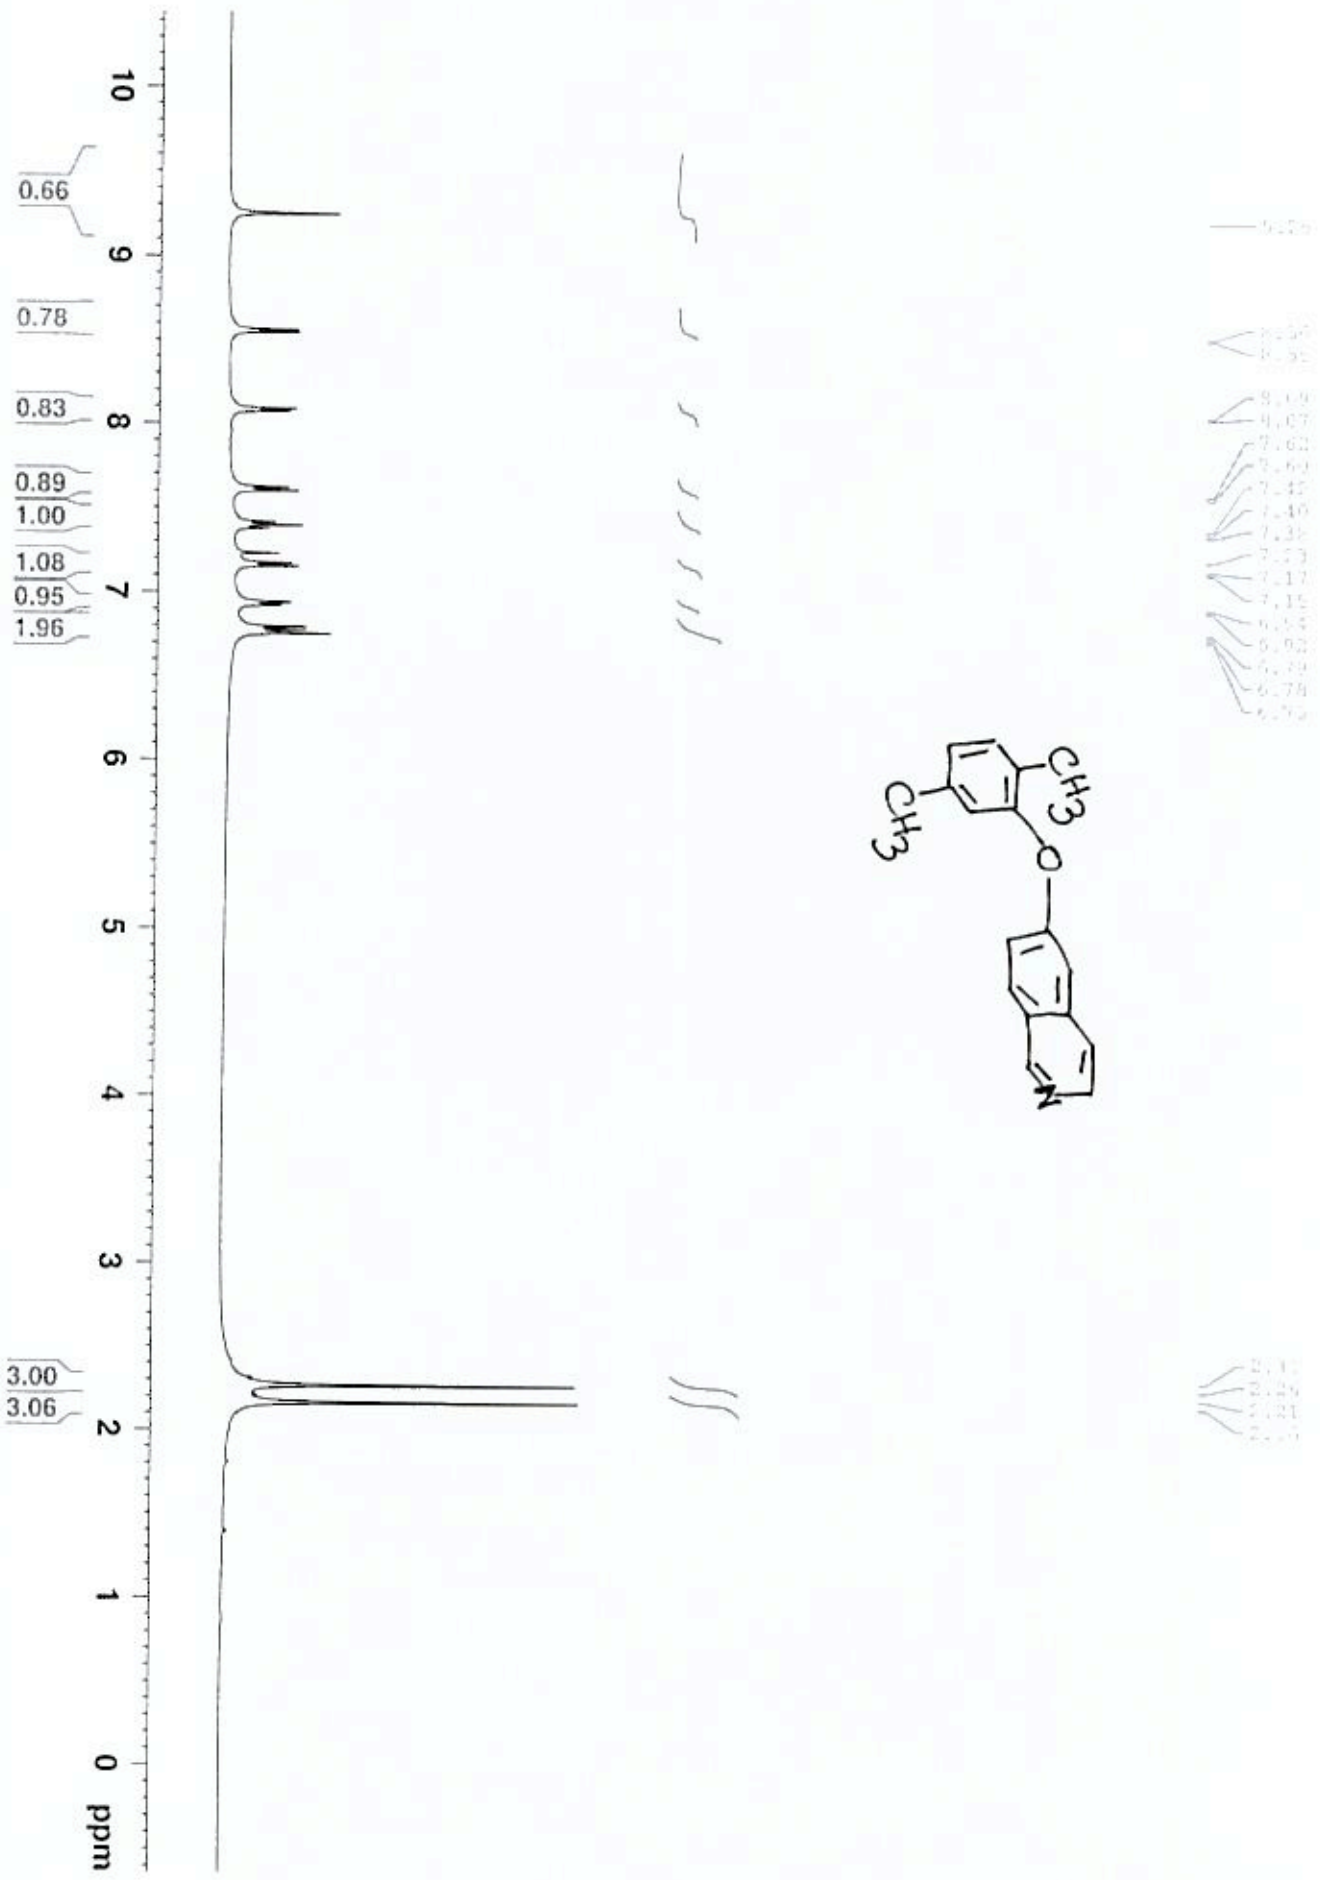

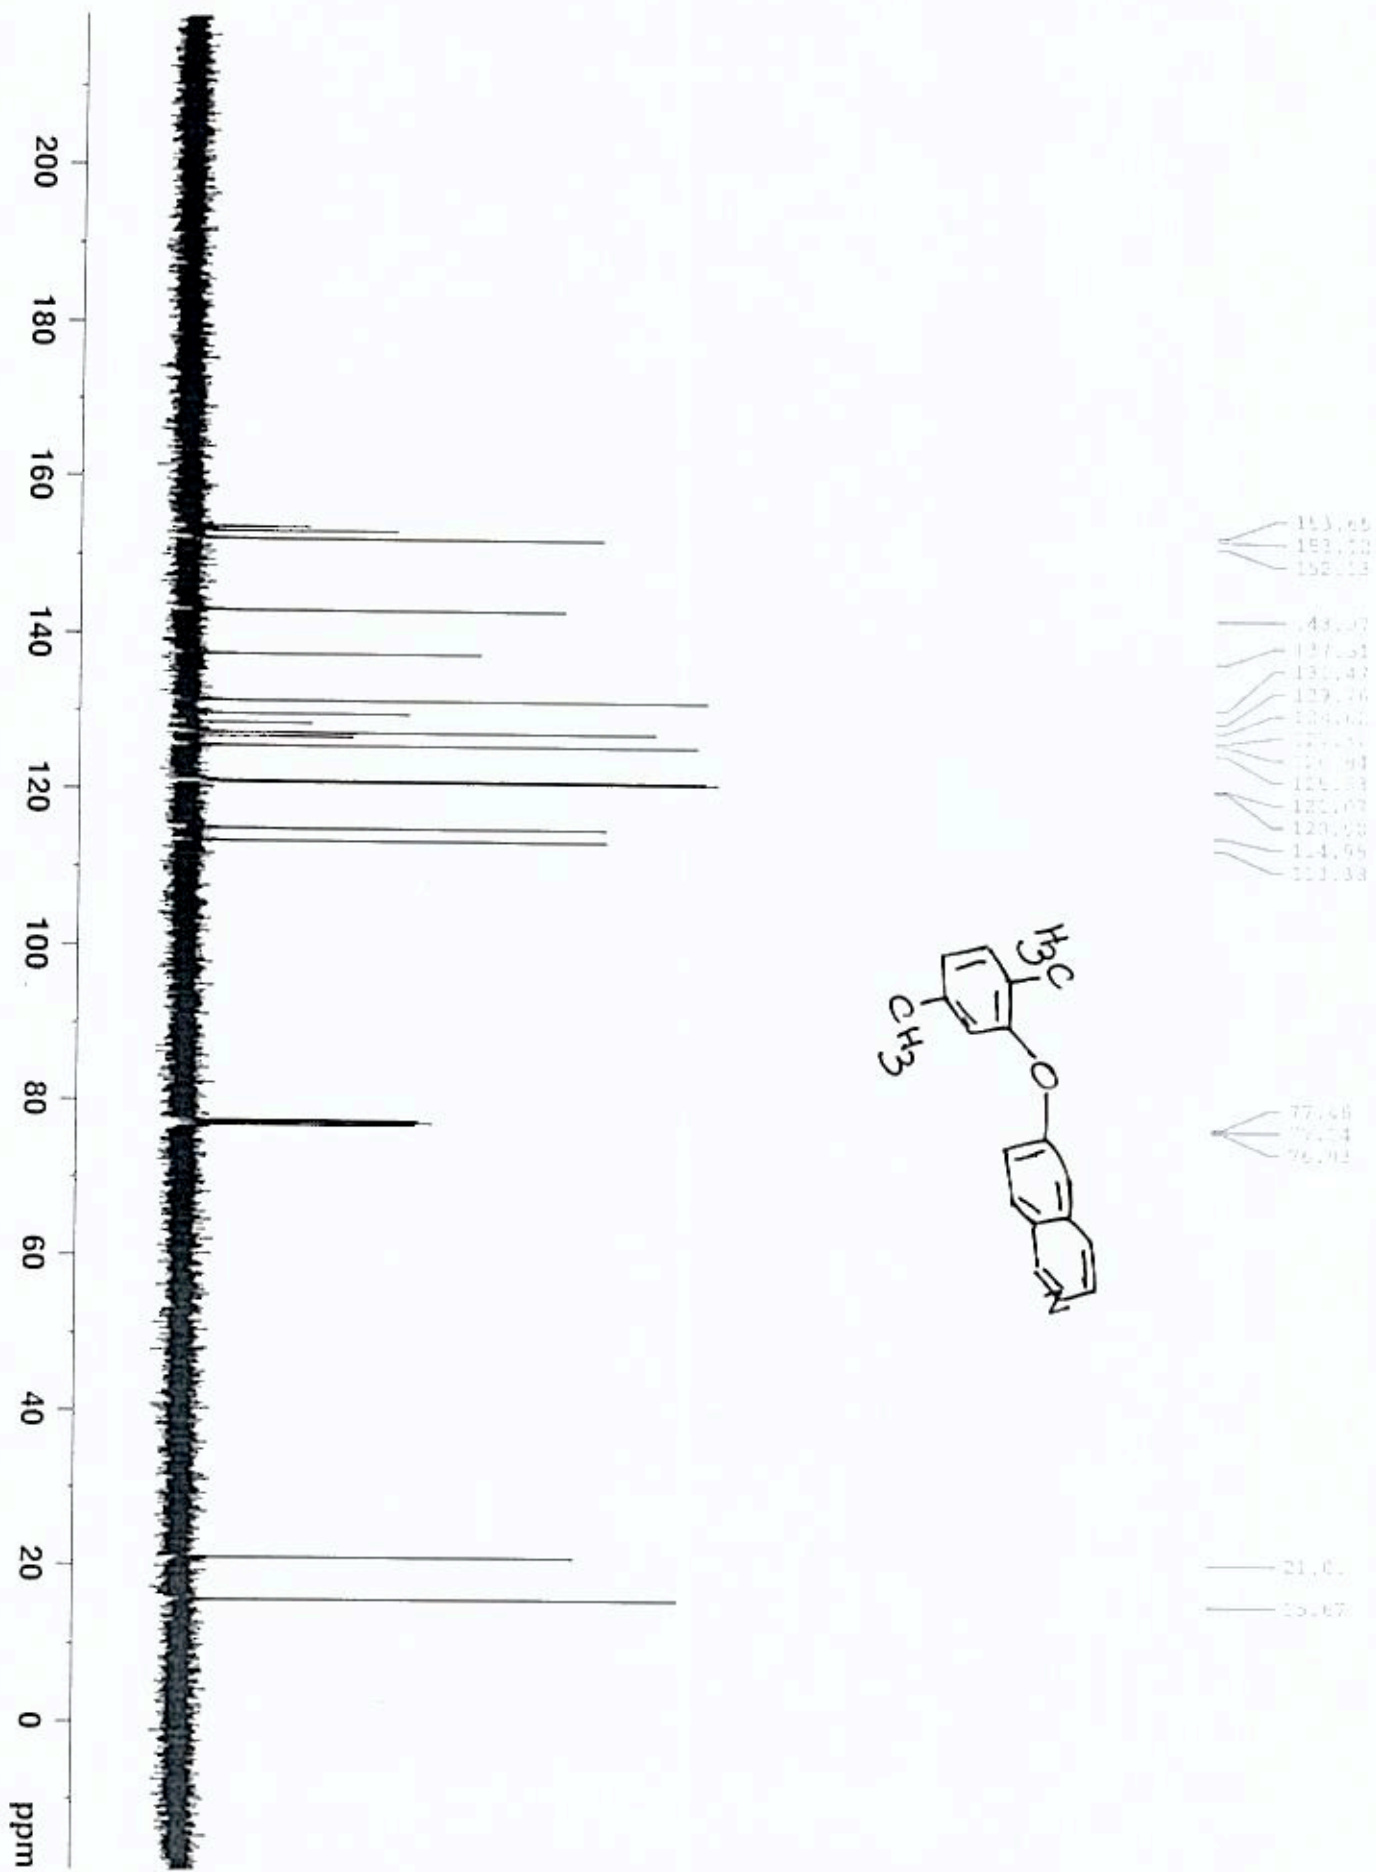



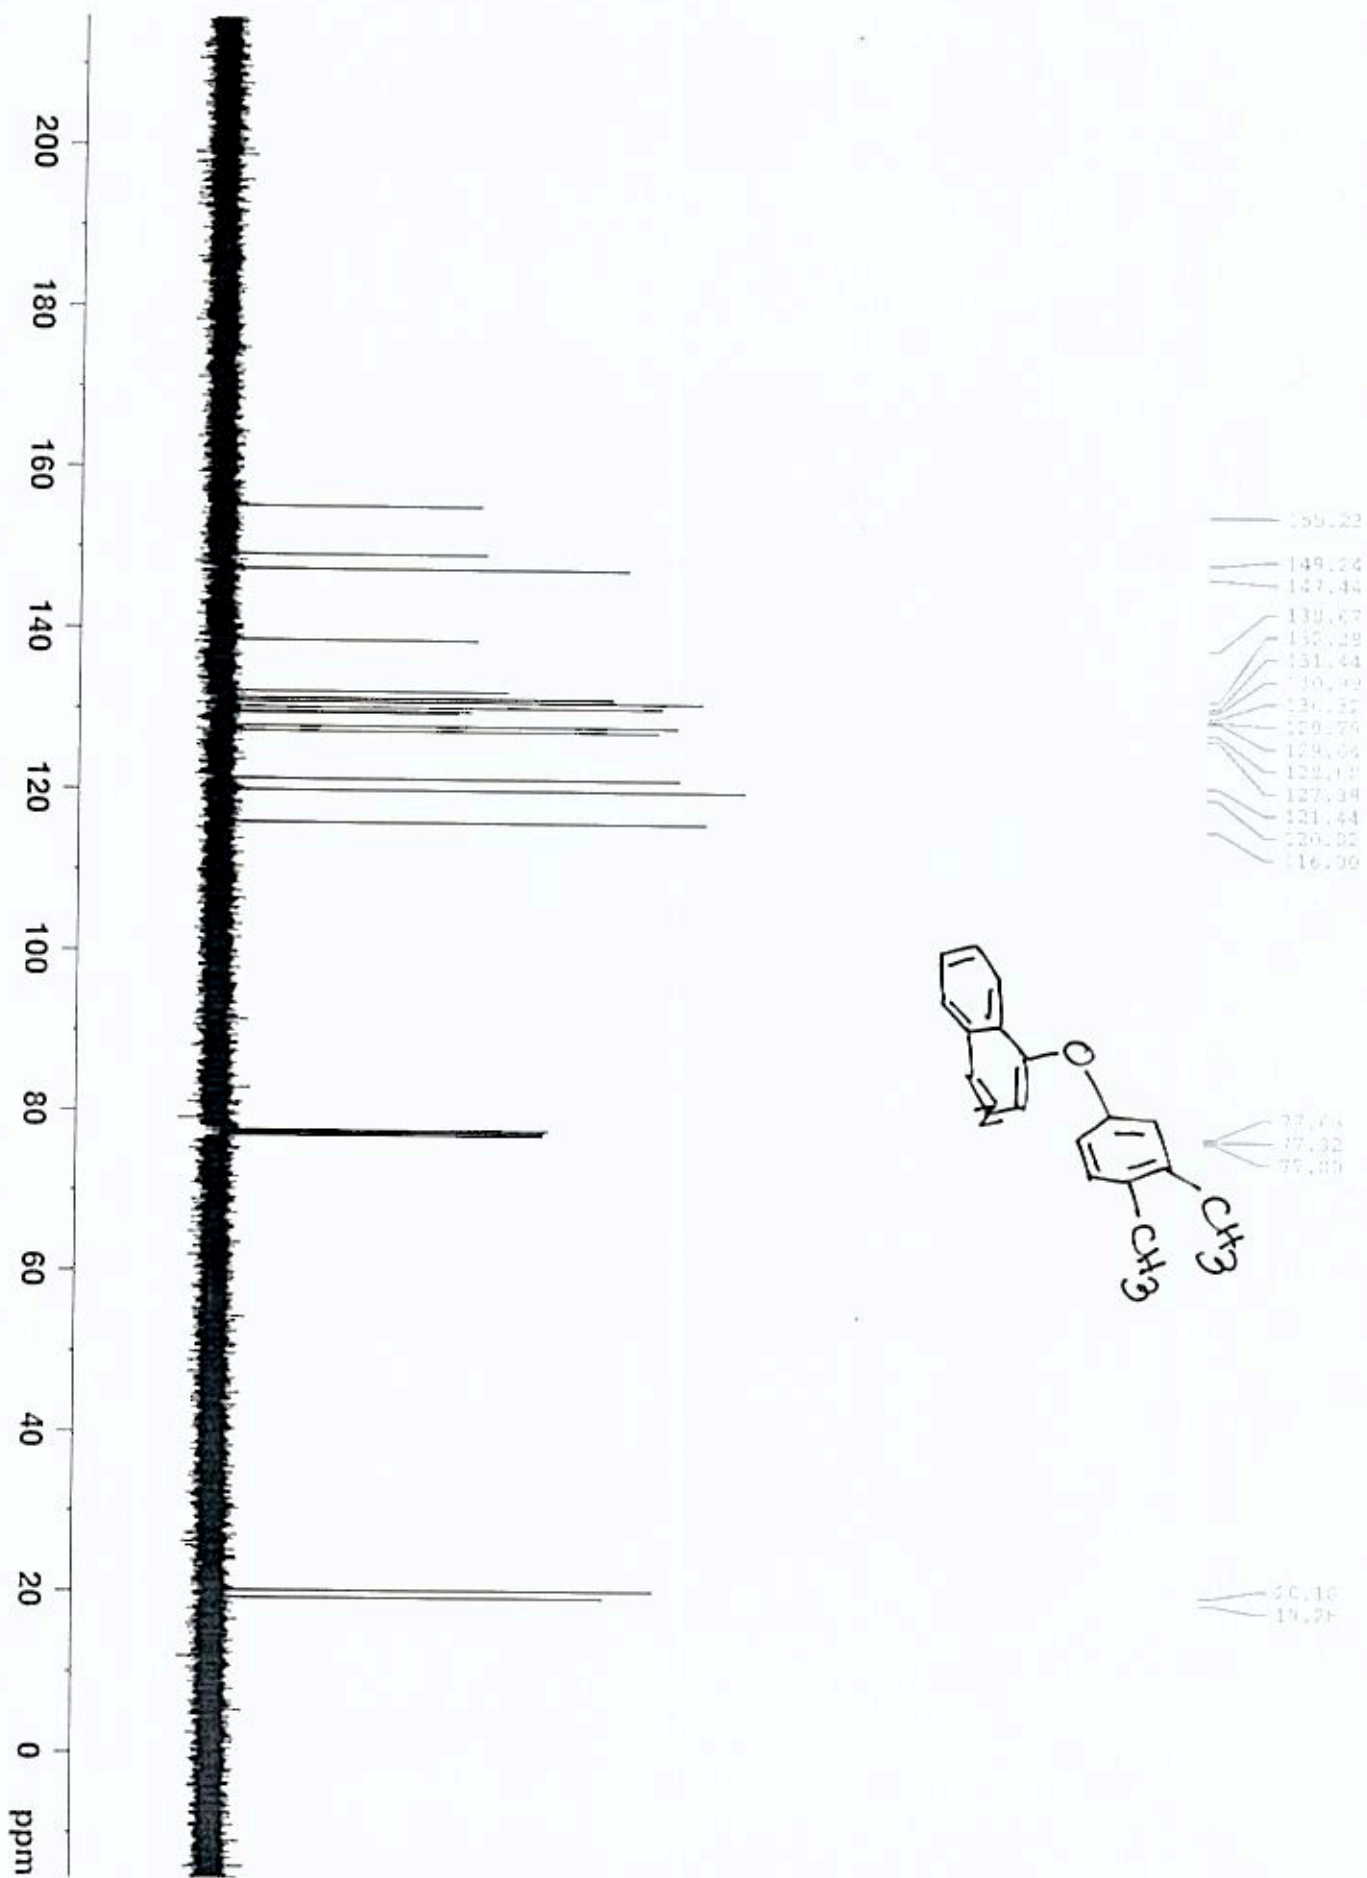

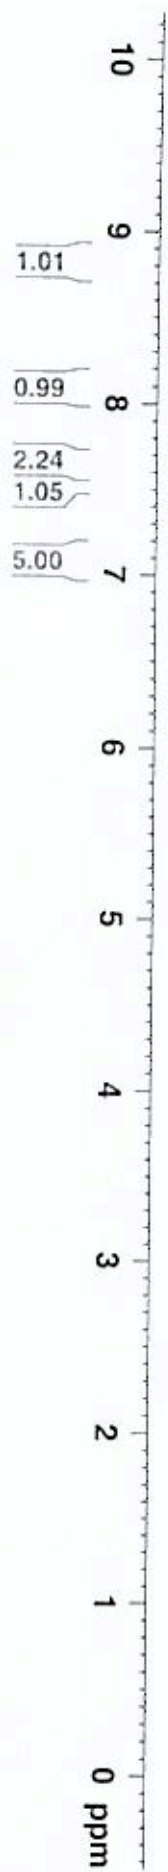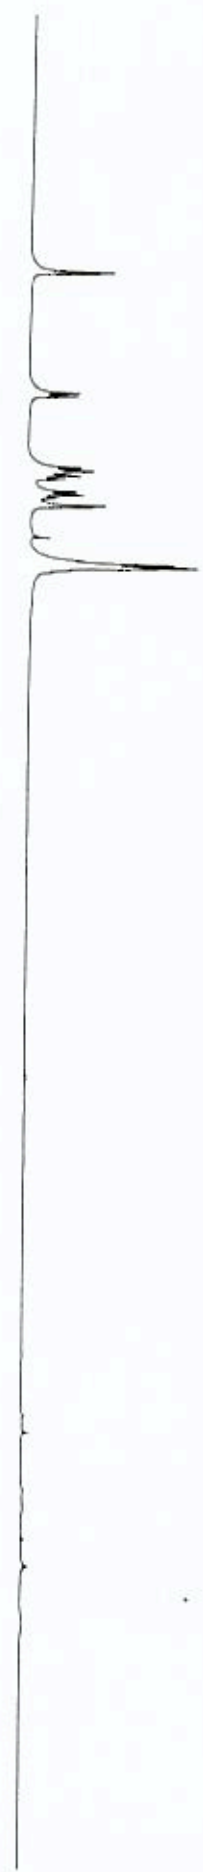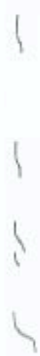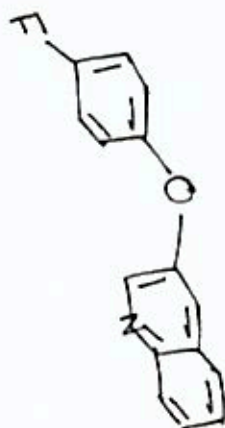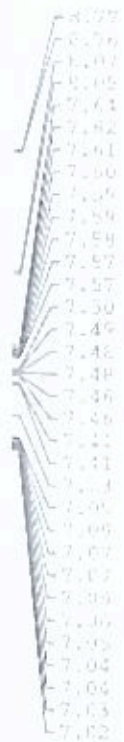

200 190 180 170 160 150 140 130 120 110 100 90 80 70 60 50 40 30 20 10 ppm

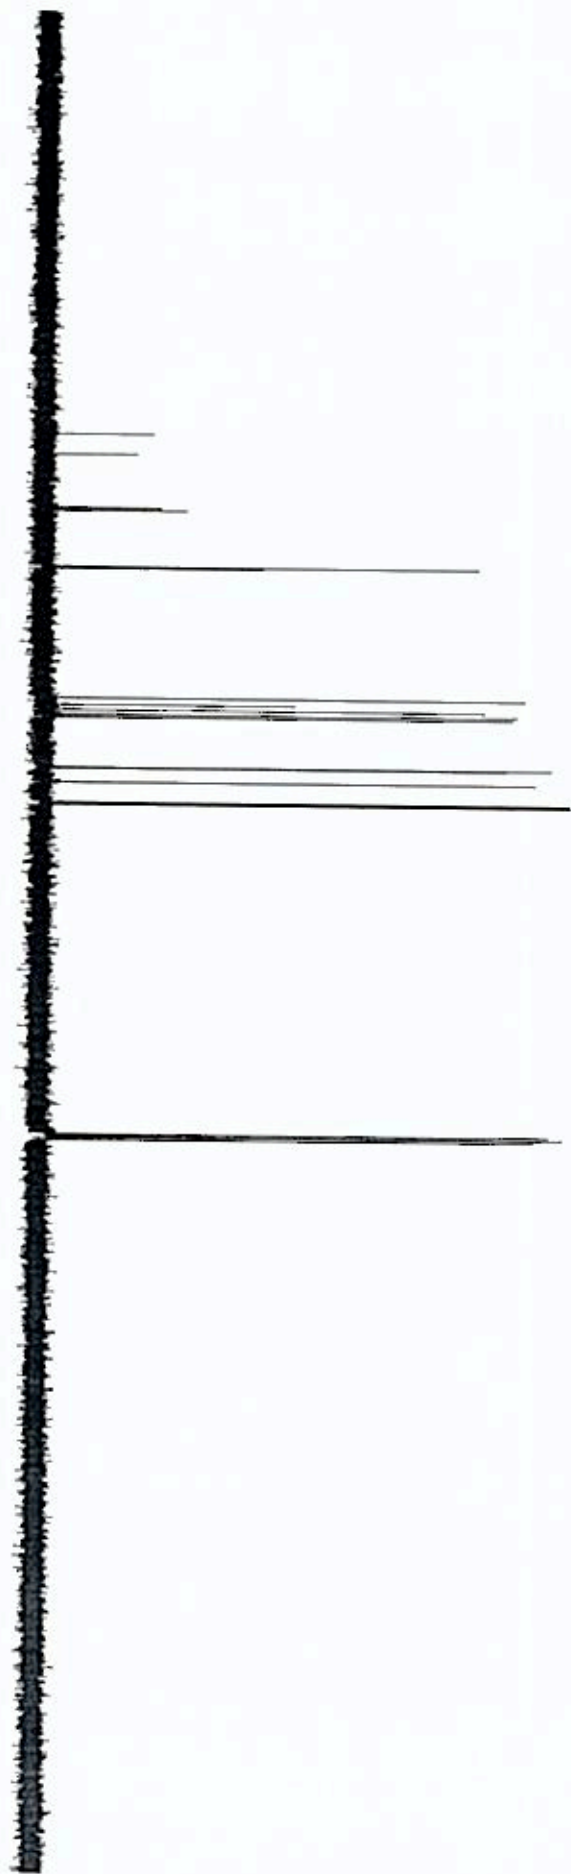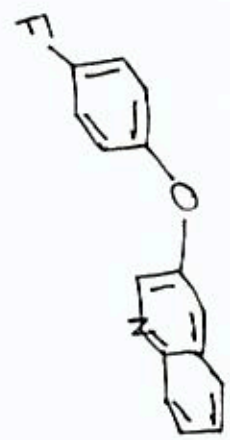

|        |        |        |        |        |        |        |        |        |        |        |        |        |        |        |        |       |       |       |
|--------|--------|--------|--------|--------|--------|--------|--------|--------|--------|--------|--------|--------|--------|--------|--------|-------|-------|-------|
| 156.79 | 158.27 | 151.63 | 151.79 | 149.36 | 148.94 | 129.47 | 129.68 | 129.09 | 127.54 | 127.12 | 121.25 | 121.17 | 119.51 | 117.09 | 116.26 | 77.26 | 77.26 | 77.21 |
|--------|--------|--------|--------|--------|--------|--------|--------|--------|--------|--------|--------|--------|--------|--------|--------|-------|-------|-------|



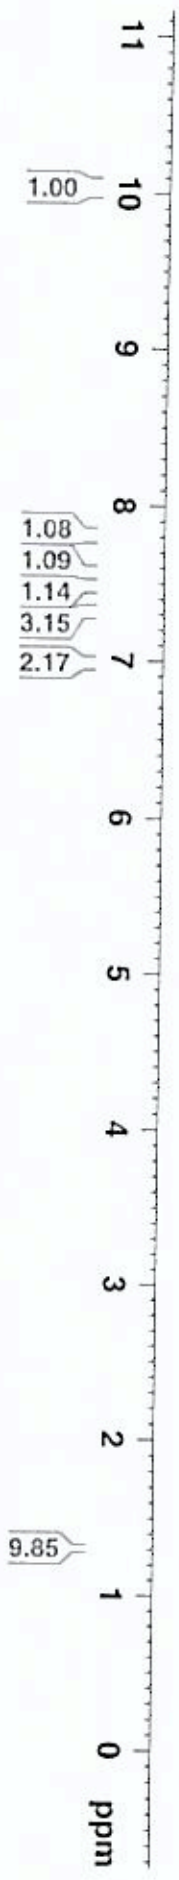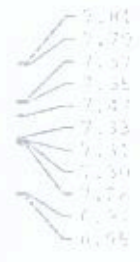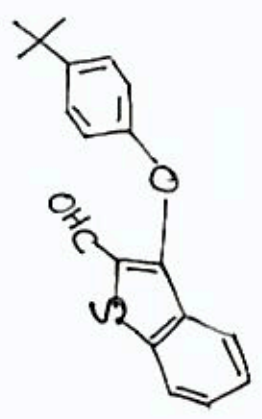

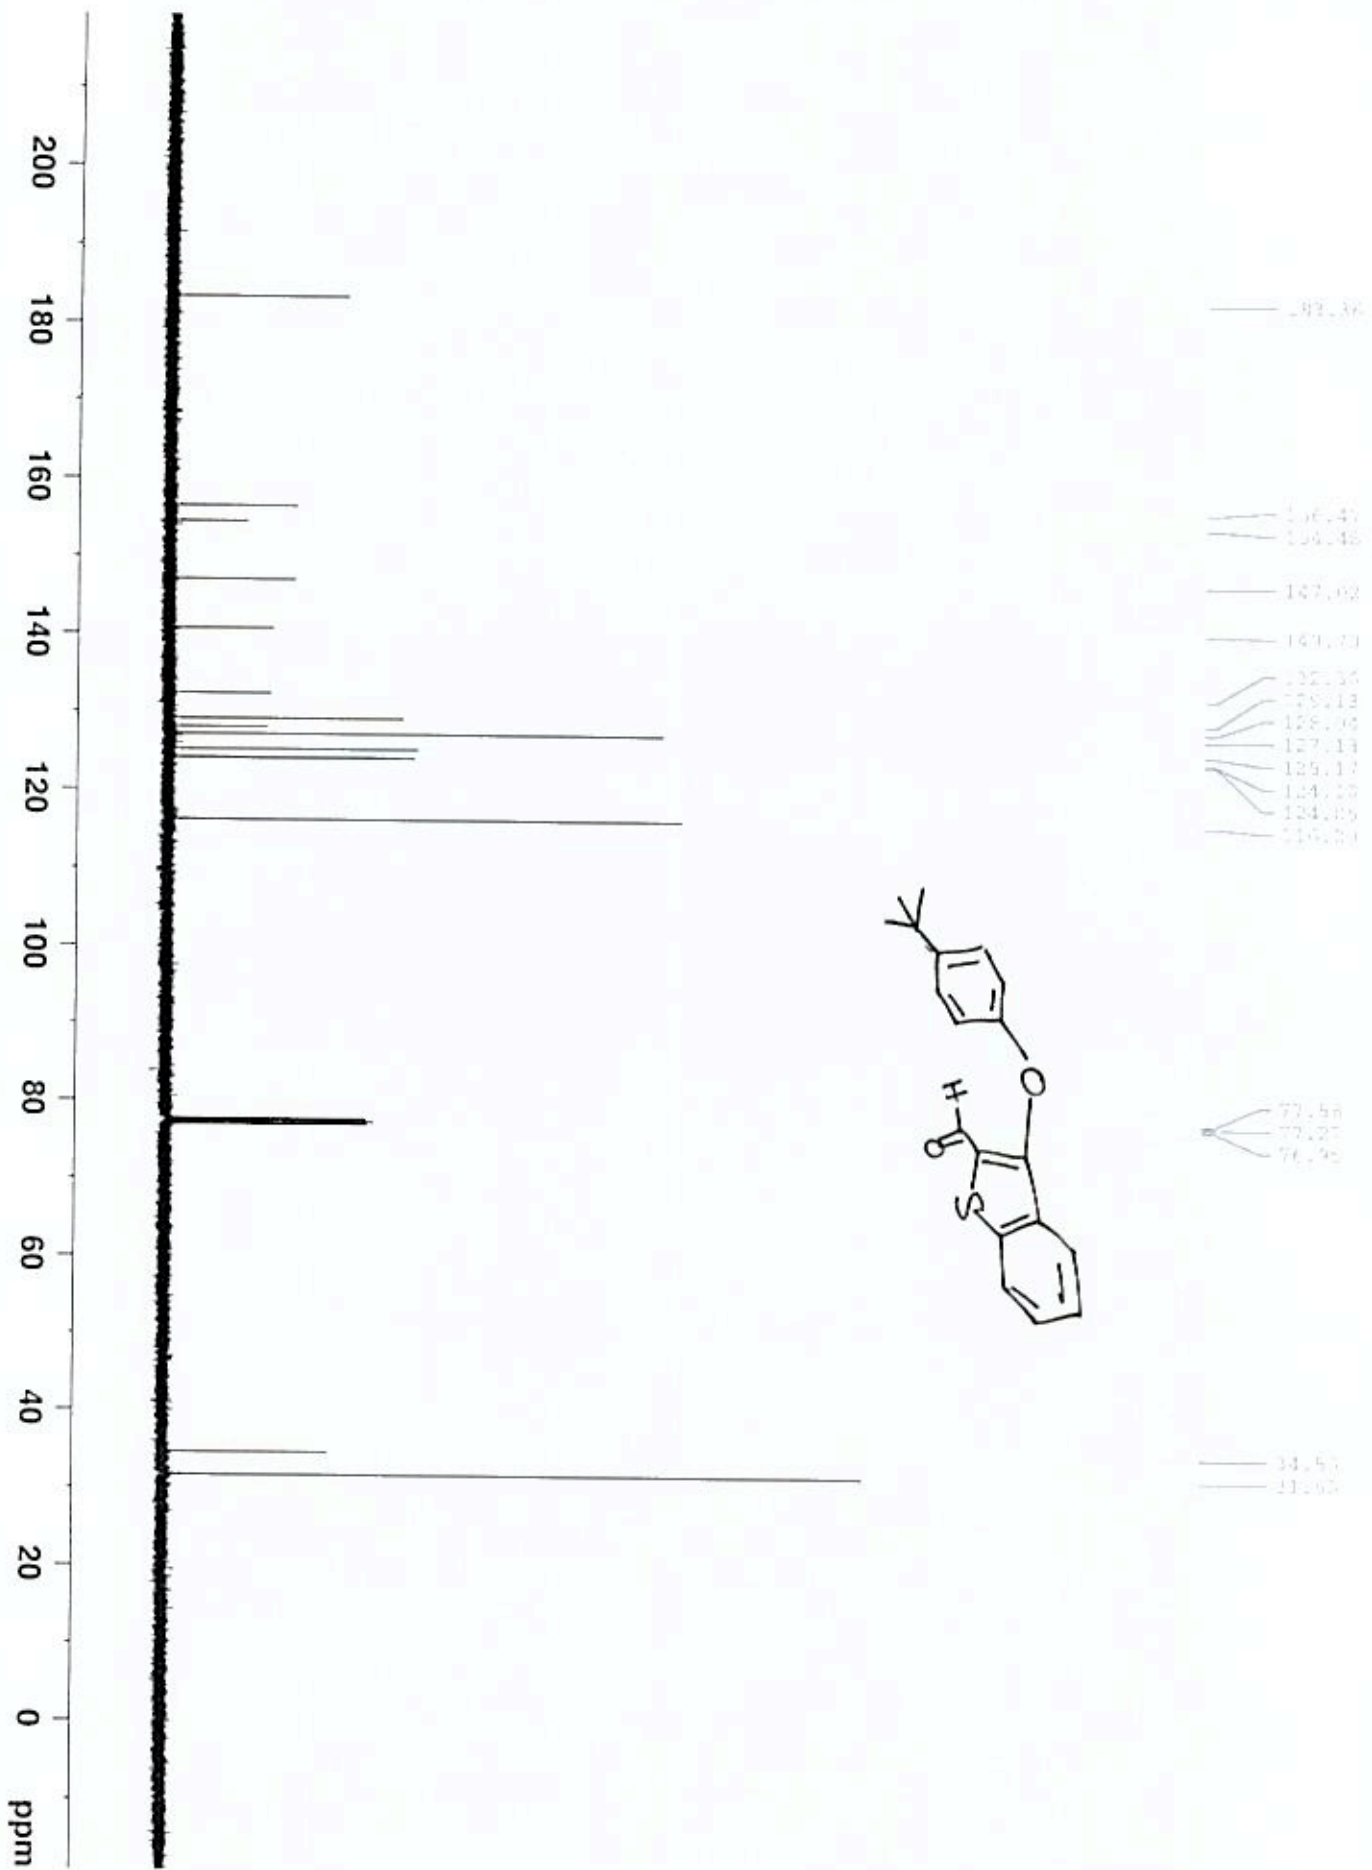

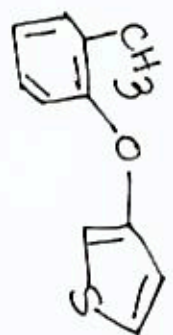

2.31

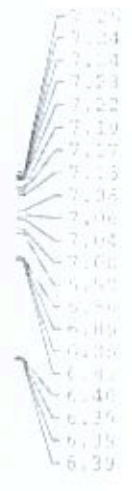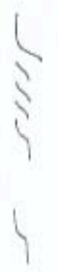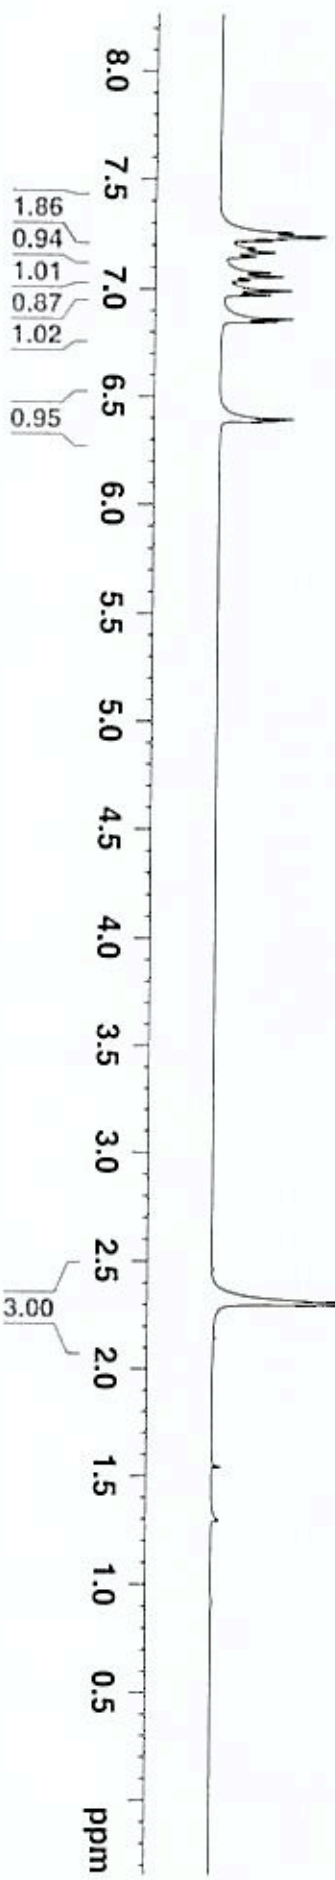

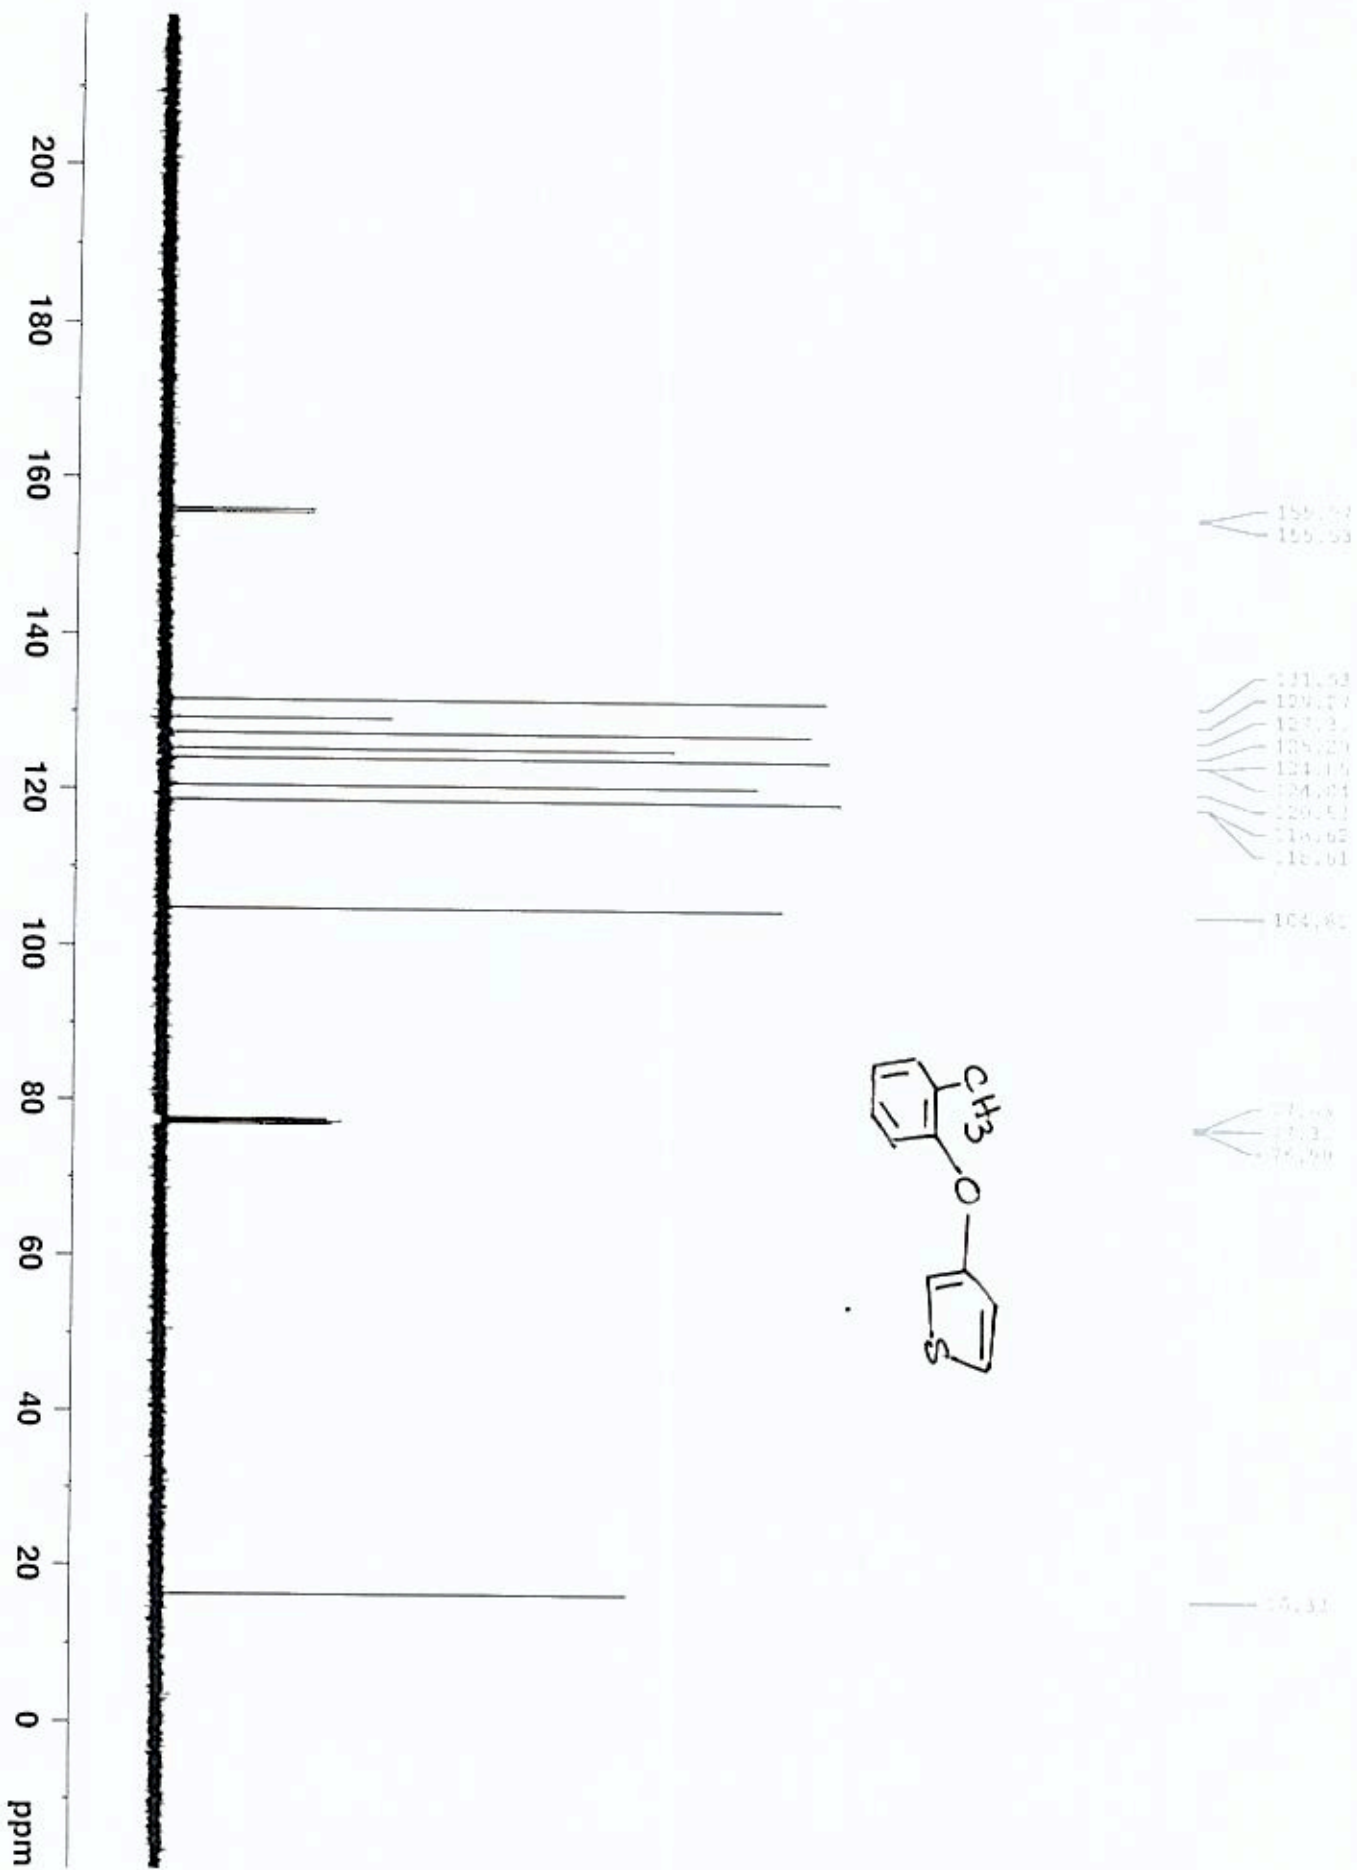

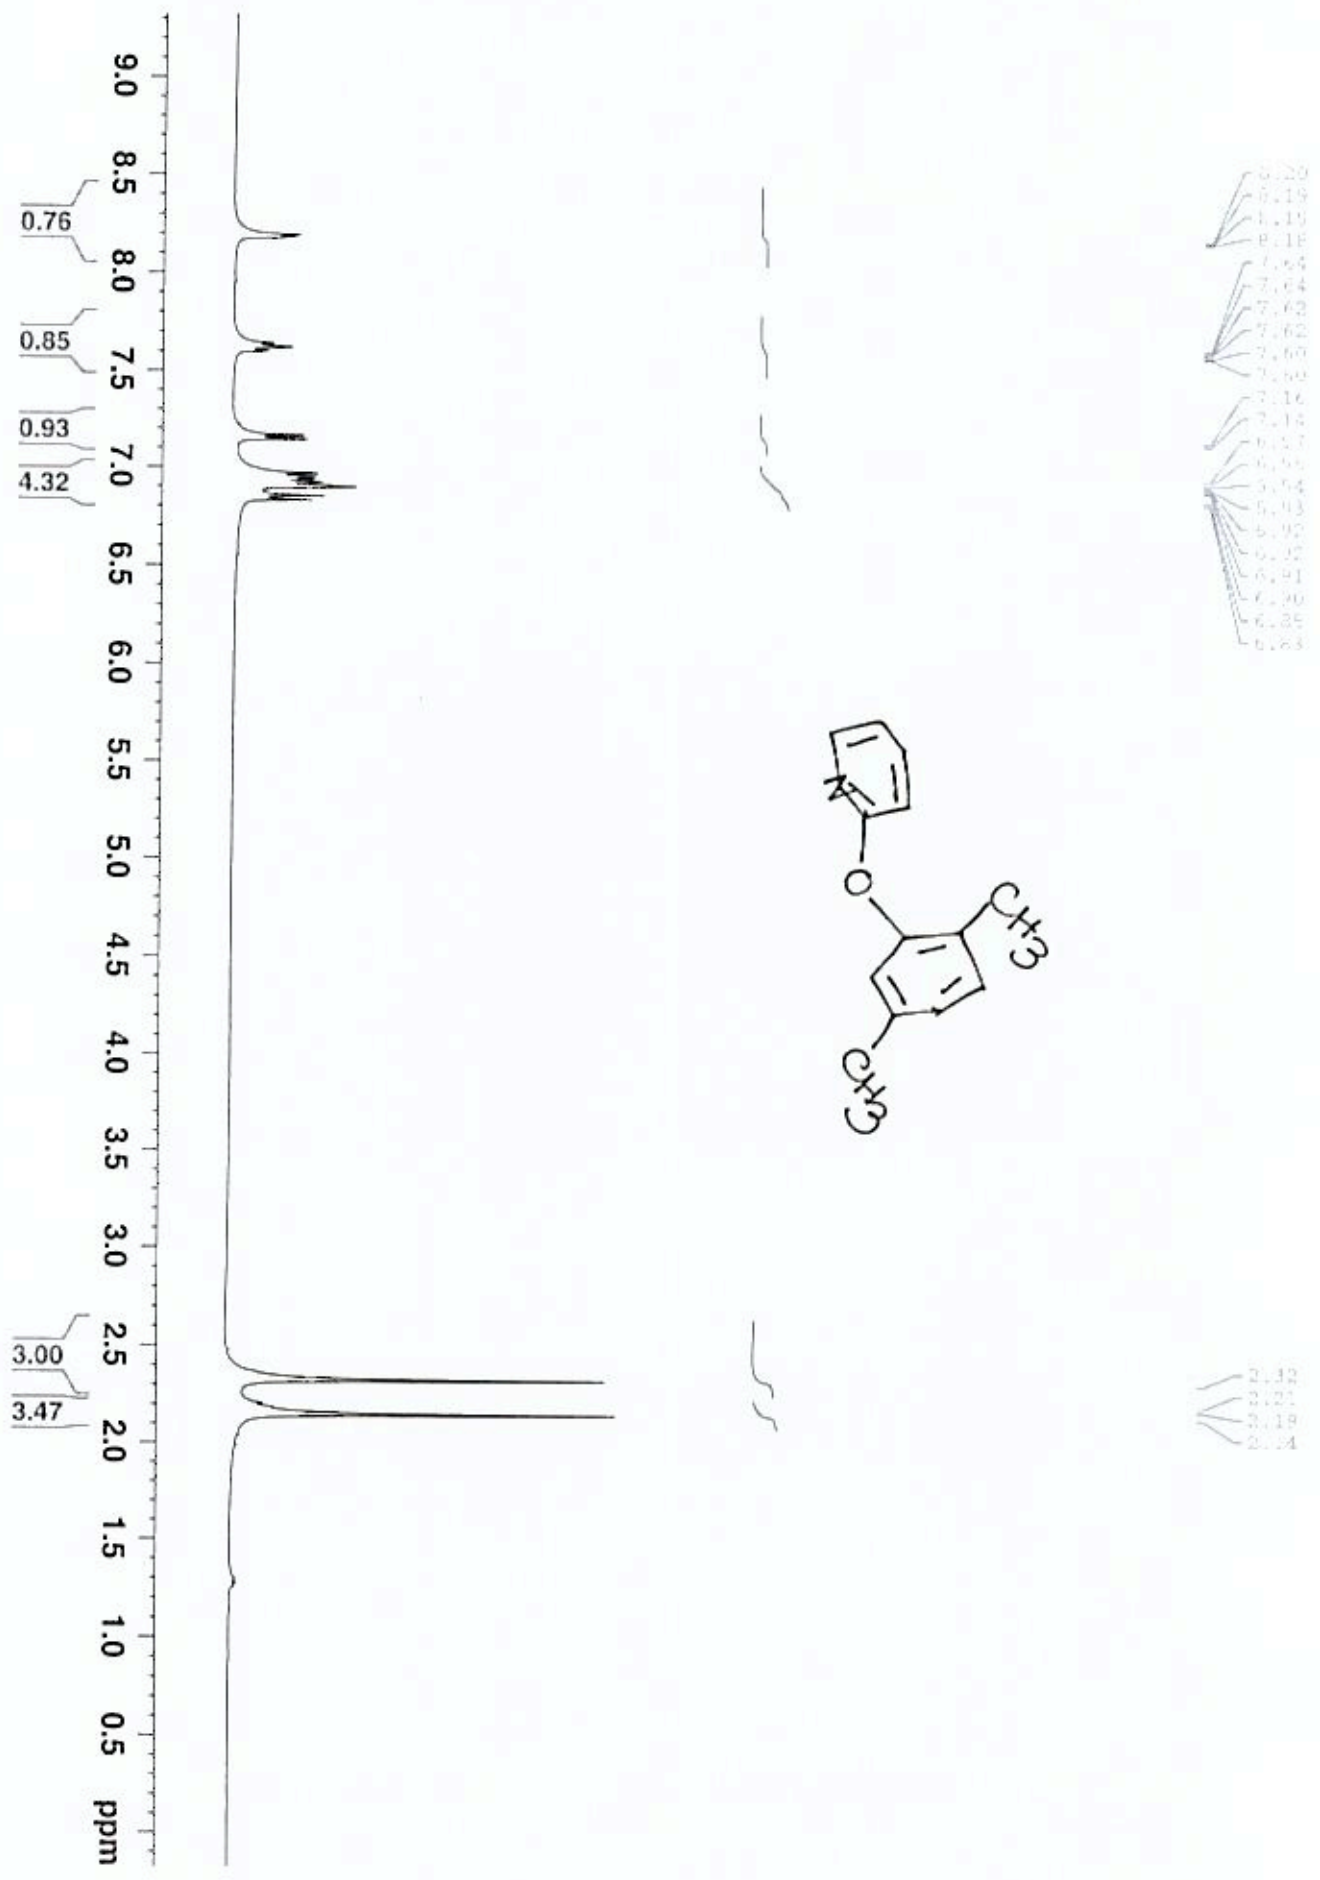

200  
180  
160  
140  
120  
100  
80  
60  
40  
20  
0  
ppm

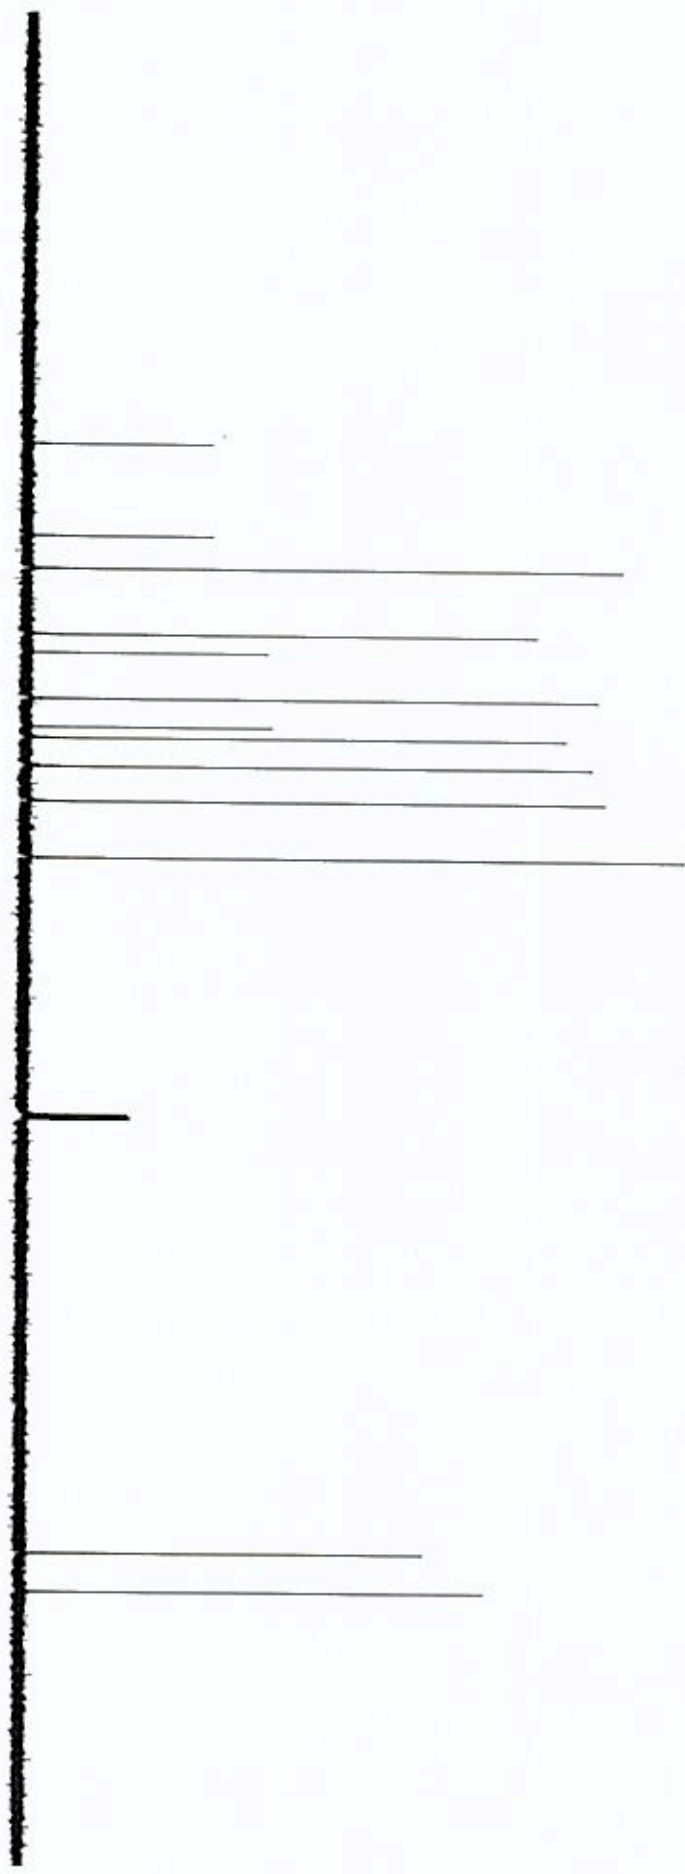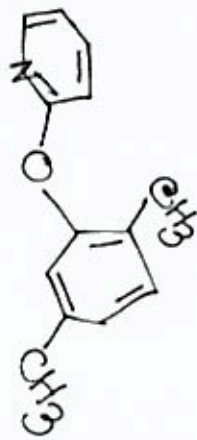

- 164.07
- 152.78
- 149.09
- 137.51
- 135.03
- 147.39
- 127.89
- 126.36
- 127.69
- 118.11
- 110.94
- 77.81
- 77.51
- 77.39
- 21.24
- 16.16

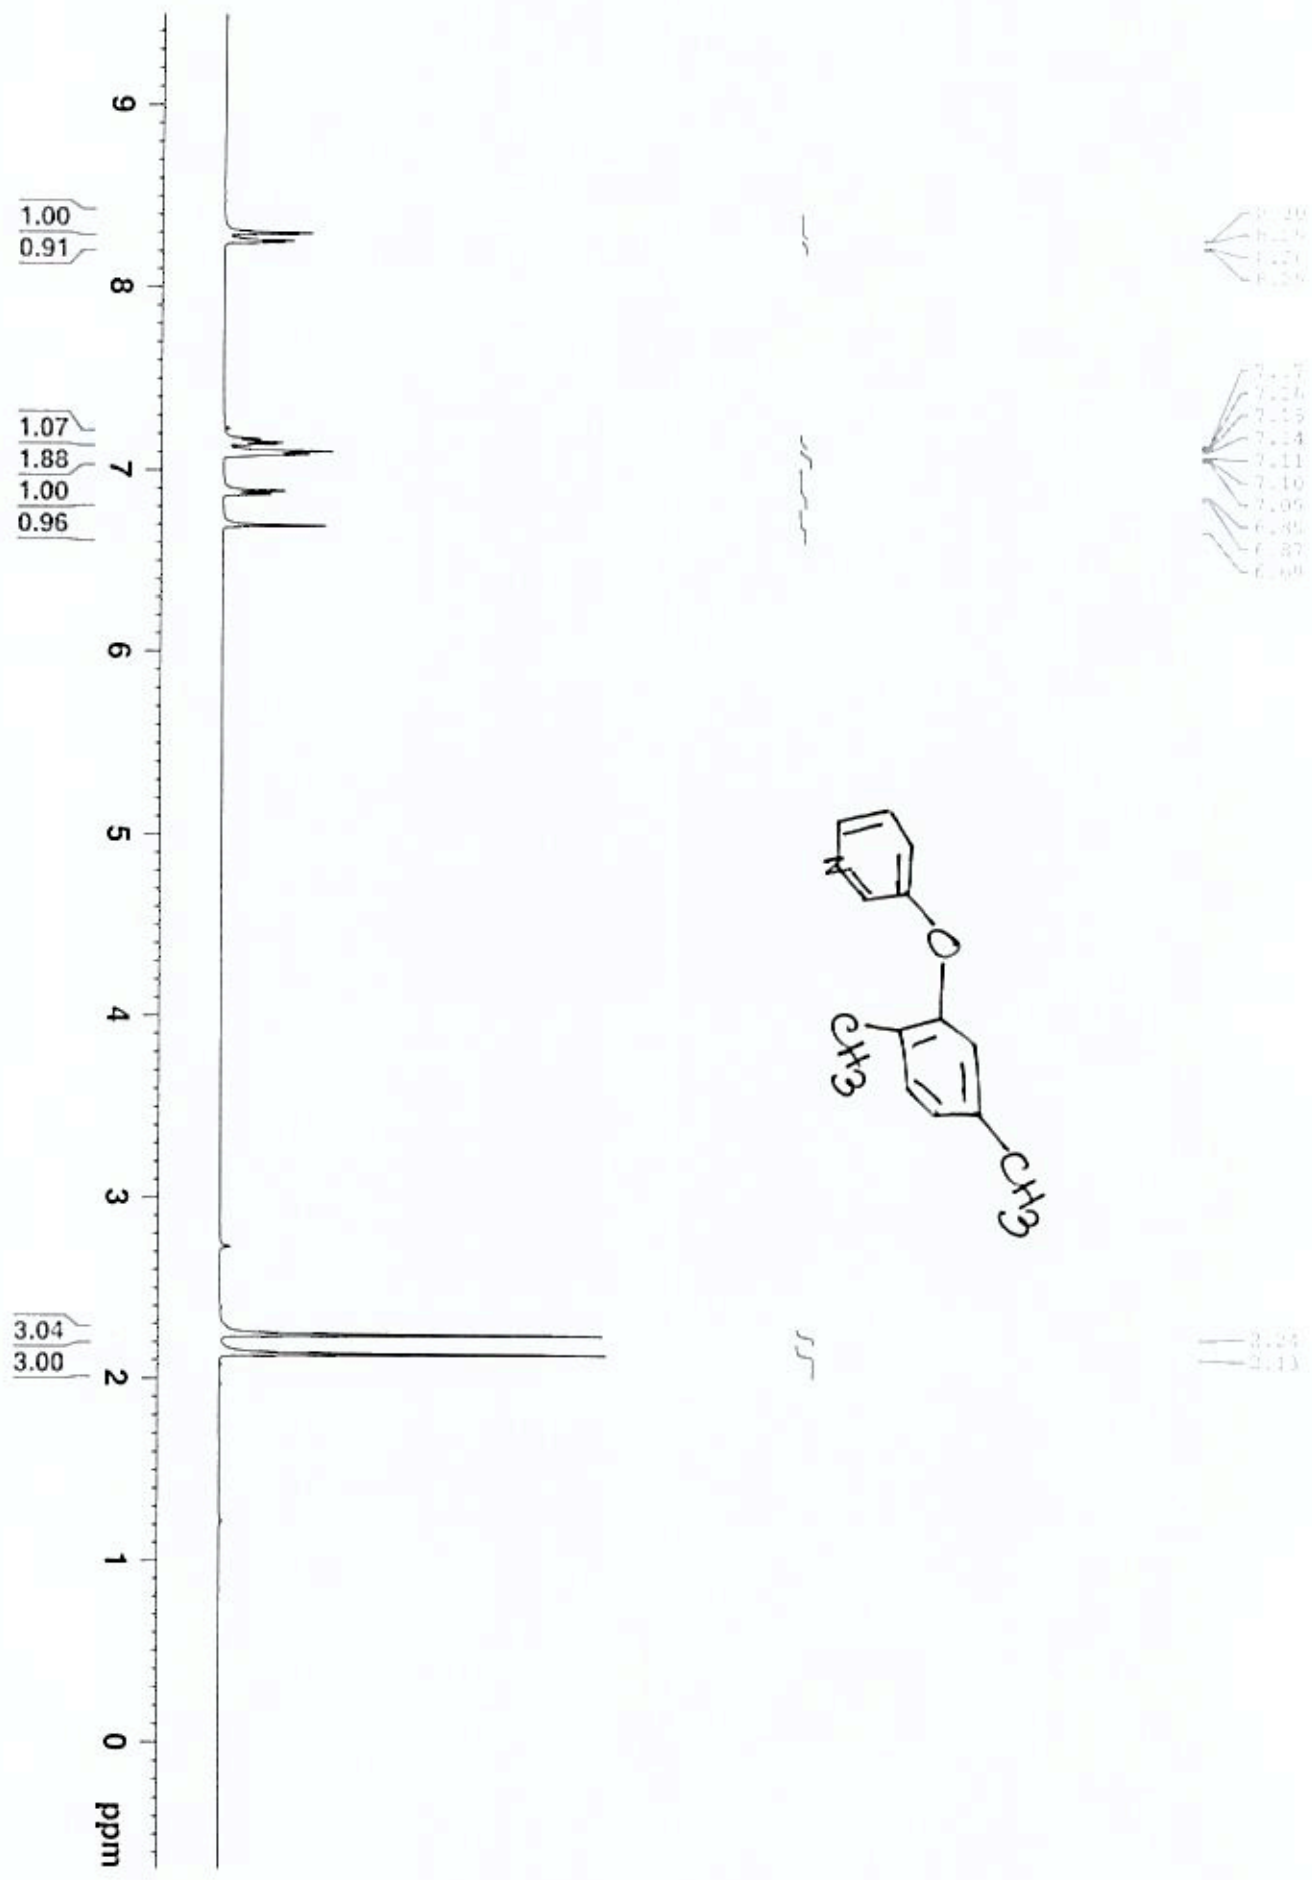

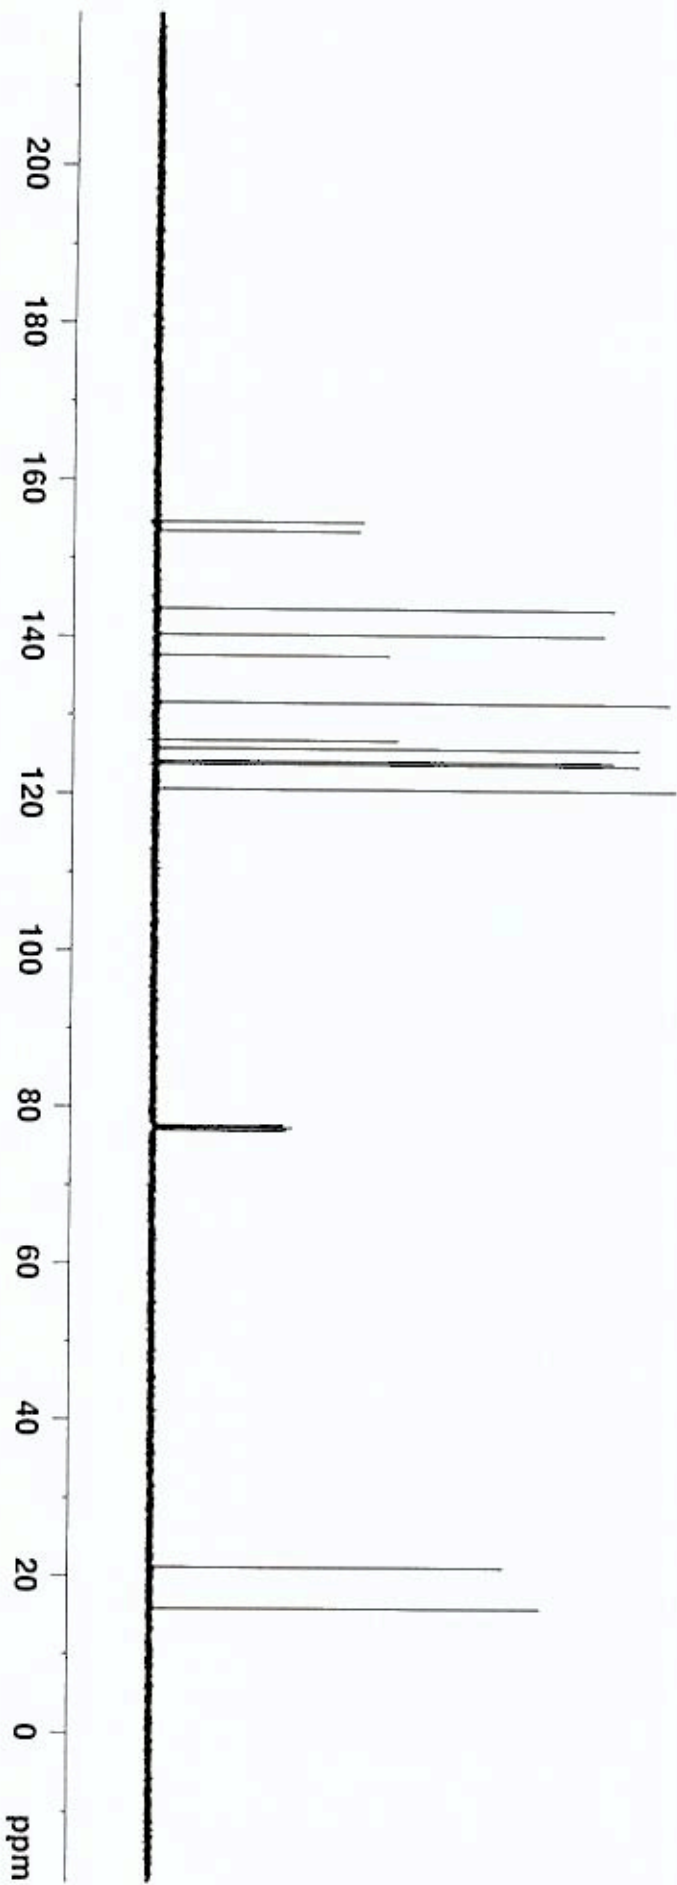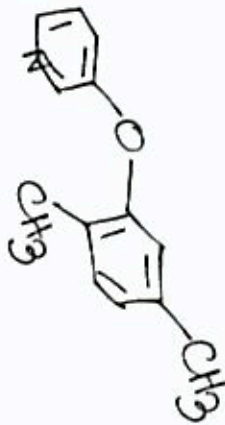

- 154.68
- 153.48
- 144.61
- 140.29
- 137.63
- 131.93
- 129.66
- 129.37
- 125.76
- 124.16
- 123.77
- 123.25
- 120.60

- 79.65
- 77.33
- 75.31

- 21.14
- 15.87



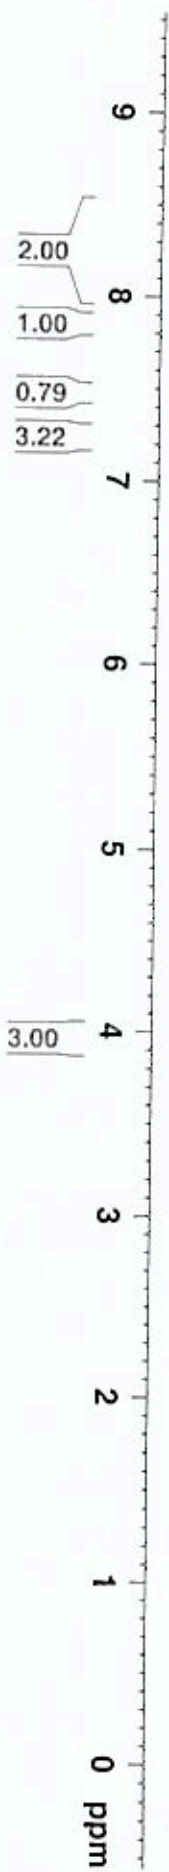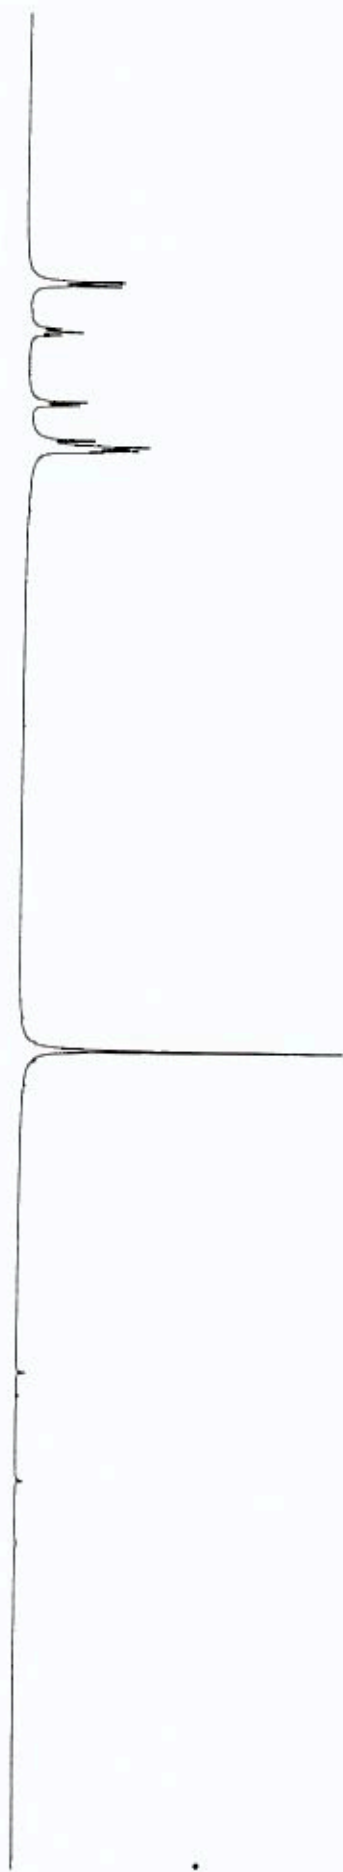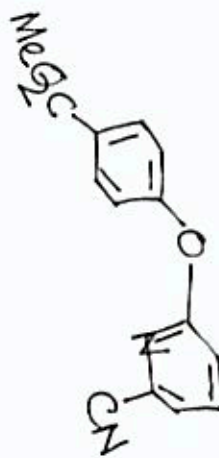

- 8.09
- 8.07
- 7.82
- 7.43
- 7.42
- 7.23
- 7.20
- 7.19
- 7.17
- 7.16

3.90

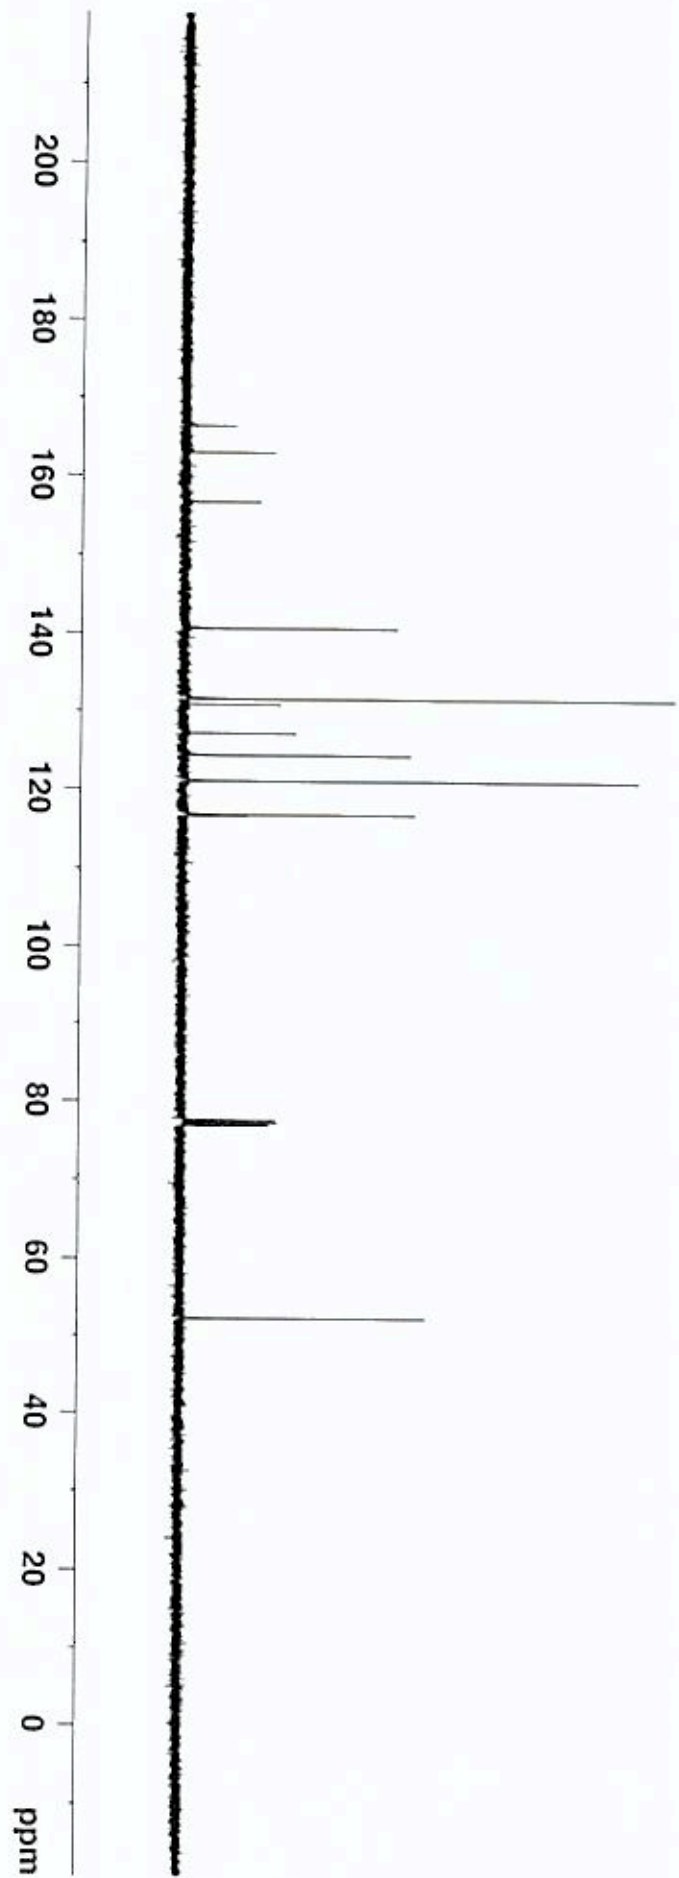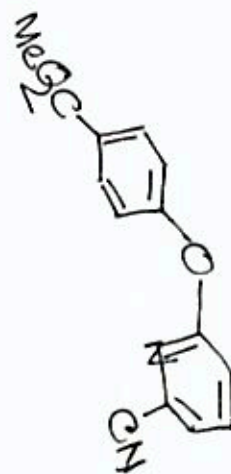

|   |        |
|---|--------|
| — | 162.35 |
| — | 157.33 |
| — | 154.93 |
| — | 140.06 |
| — | 132.04 |
| — | 131.79 |
| — | 127.08 |
| — | 124.27 |
| — | 123.97 |
| — | 122.71 |
| — | 116.69 |
| — | 78.47  |
| — | 77.17  |
| — | 76.35  |
| — | 52.22  |



200 180 160 140 120 100 80 60 40 20 0 ppm

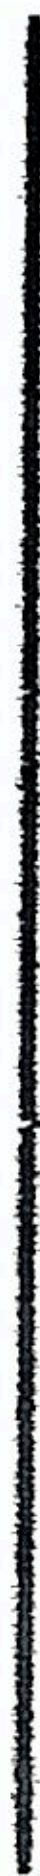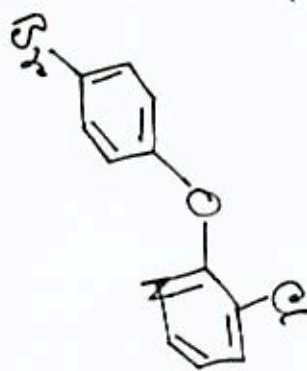

159.85  
145.36  
140.84  
137.81  
123.71  
119.76  
114.33  
110.28

77.18  
77.07  
76.96



200 180 160 140 120 100 80 60 40 20 0 ppm

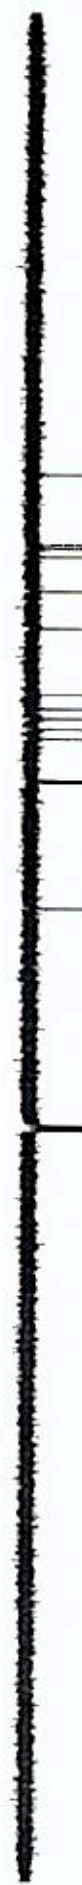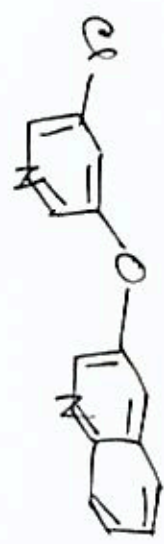

- 163.93
- 151.63
- 151.17
- 149.11
- 145.78
- 141.30
- 132.64
- 132.39
- 129.86
- 129.22
- 126.98
- 121.50
- 121.33
- 77.00
- 76.56
- 76.15

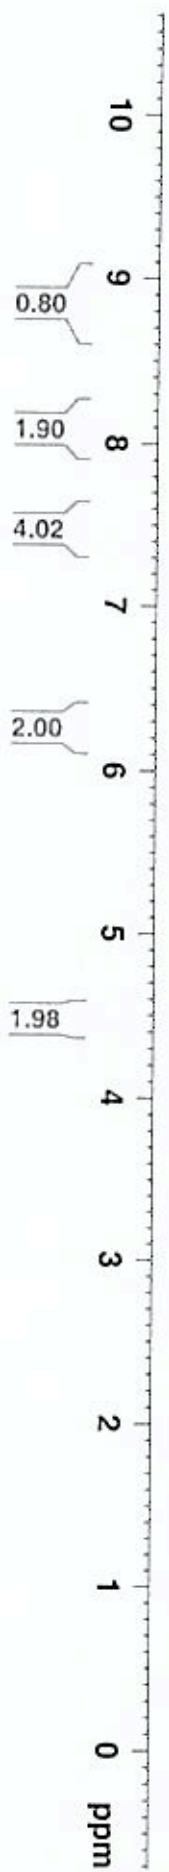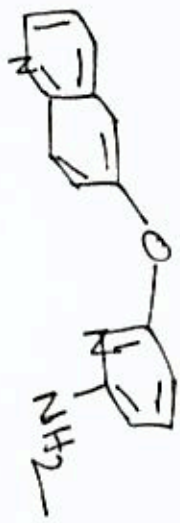

- 8.31
- 8.31
- 8.30
- 8.30
- 8.06
- 8.01
- 8.04
- 8.02
- 7.19
- 7.48
- 7.47
- 7.46
- 7.41
- 7.41
- 7.40
- 7.39
- 7.37
- 7.34
- 7.32
- 7.32
- 7.31
- 7.18
- 6.18
- 6.17
- 6.16
- 6.15
- 6.15
- 4.54

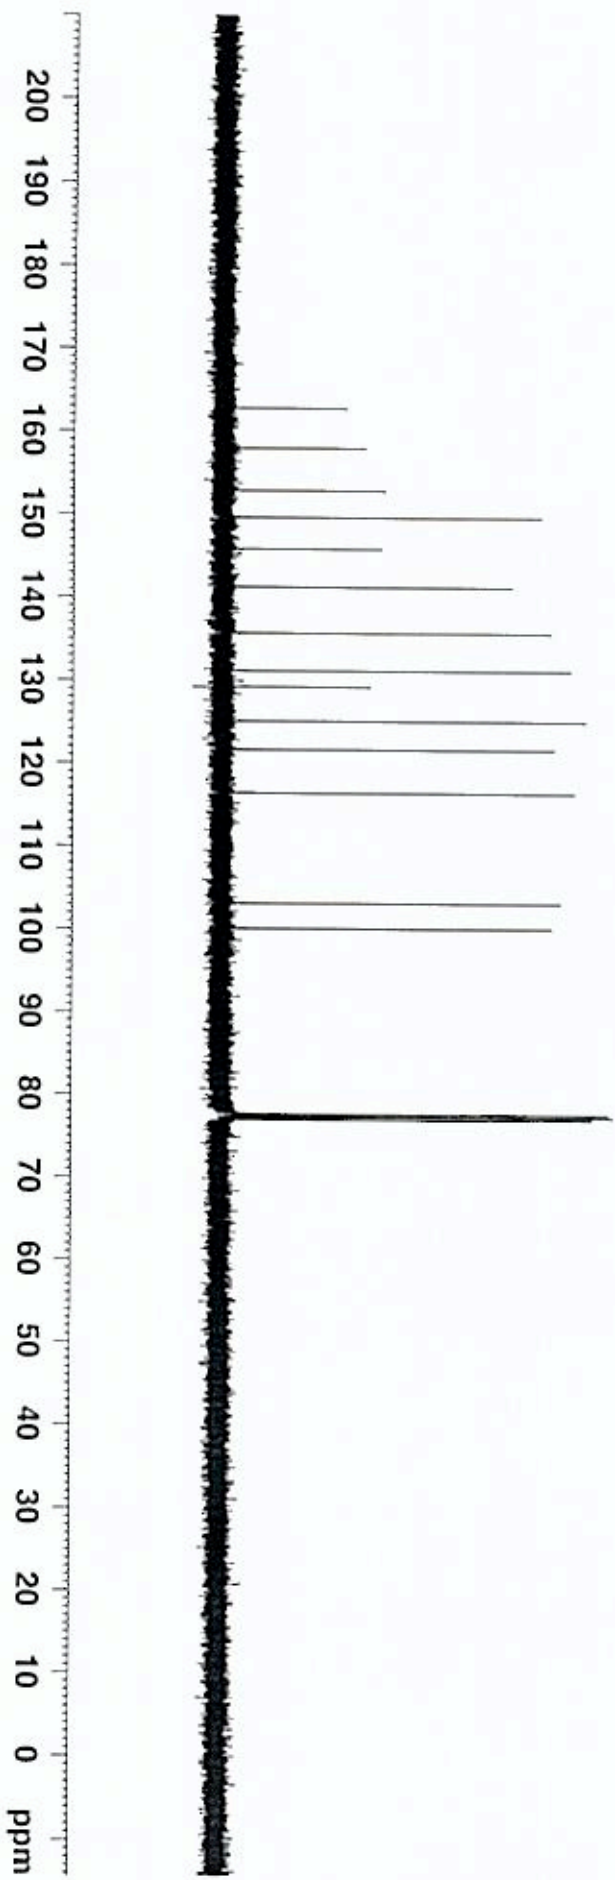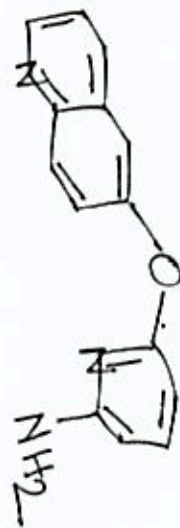

- 163.75
- 159.01
- 157.55
- 149.63
- 145.83
- 141.12
- 135.56
- 131.71
- 129.27
- 126.29
- 121.67
- 116.36
- 105.14
- 101.06

77.00  
77.00  
77.00



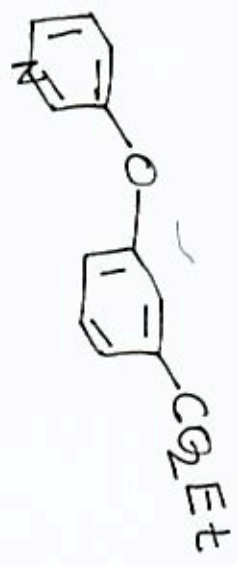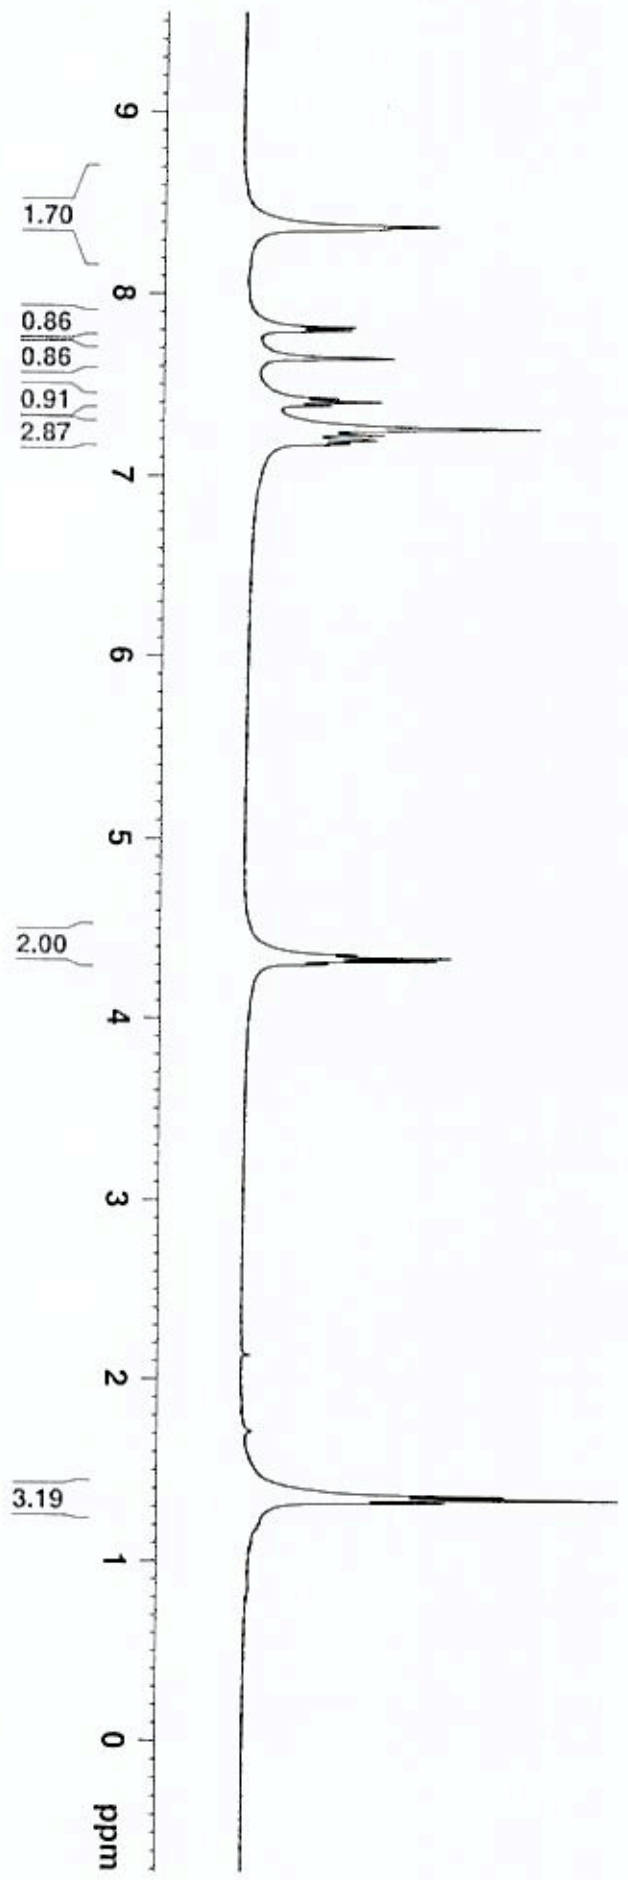

- 8.20
- 8.17
- 8.15
- 7.97
- 7.90
- 7.85
- 7.82
- 7.77
- 7.73
- 7.70
- 7.66
- 7.63

- 4.35
- 4.34
- 4.32
- 4.31

- 1.22
- 1.20
- 1.18

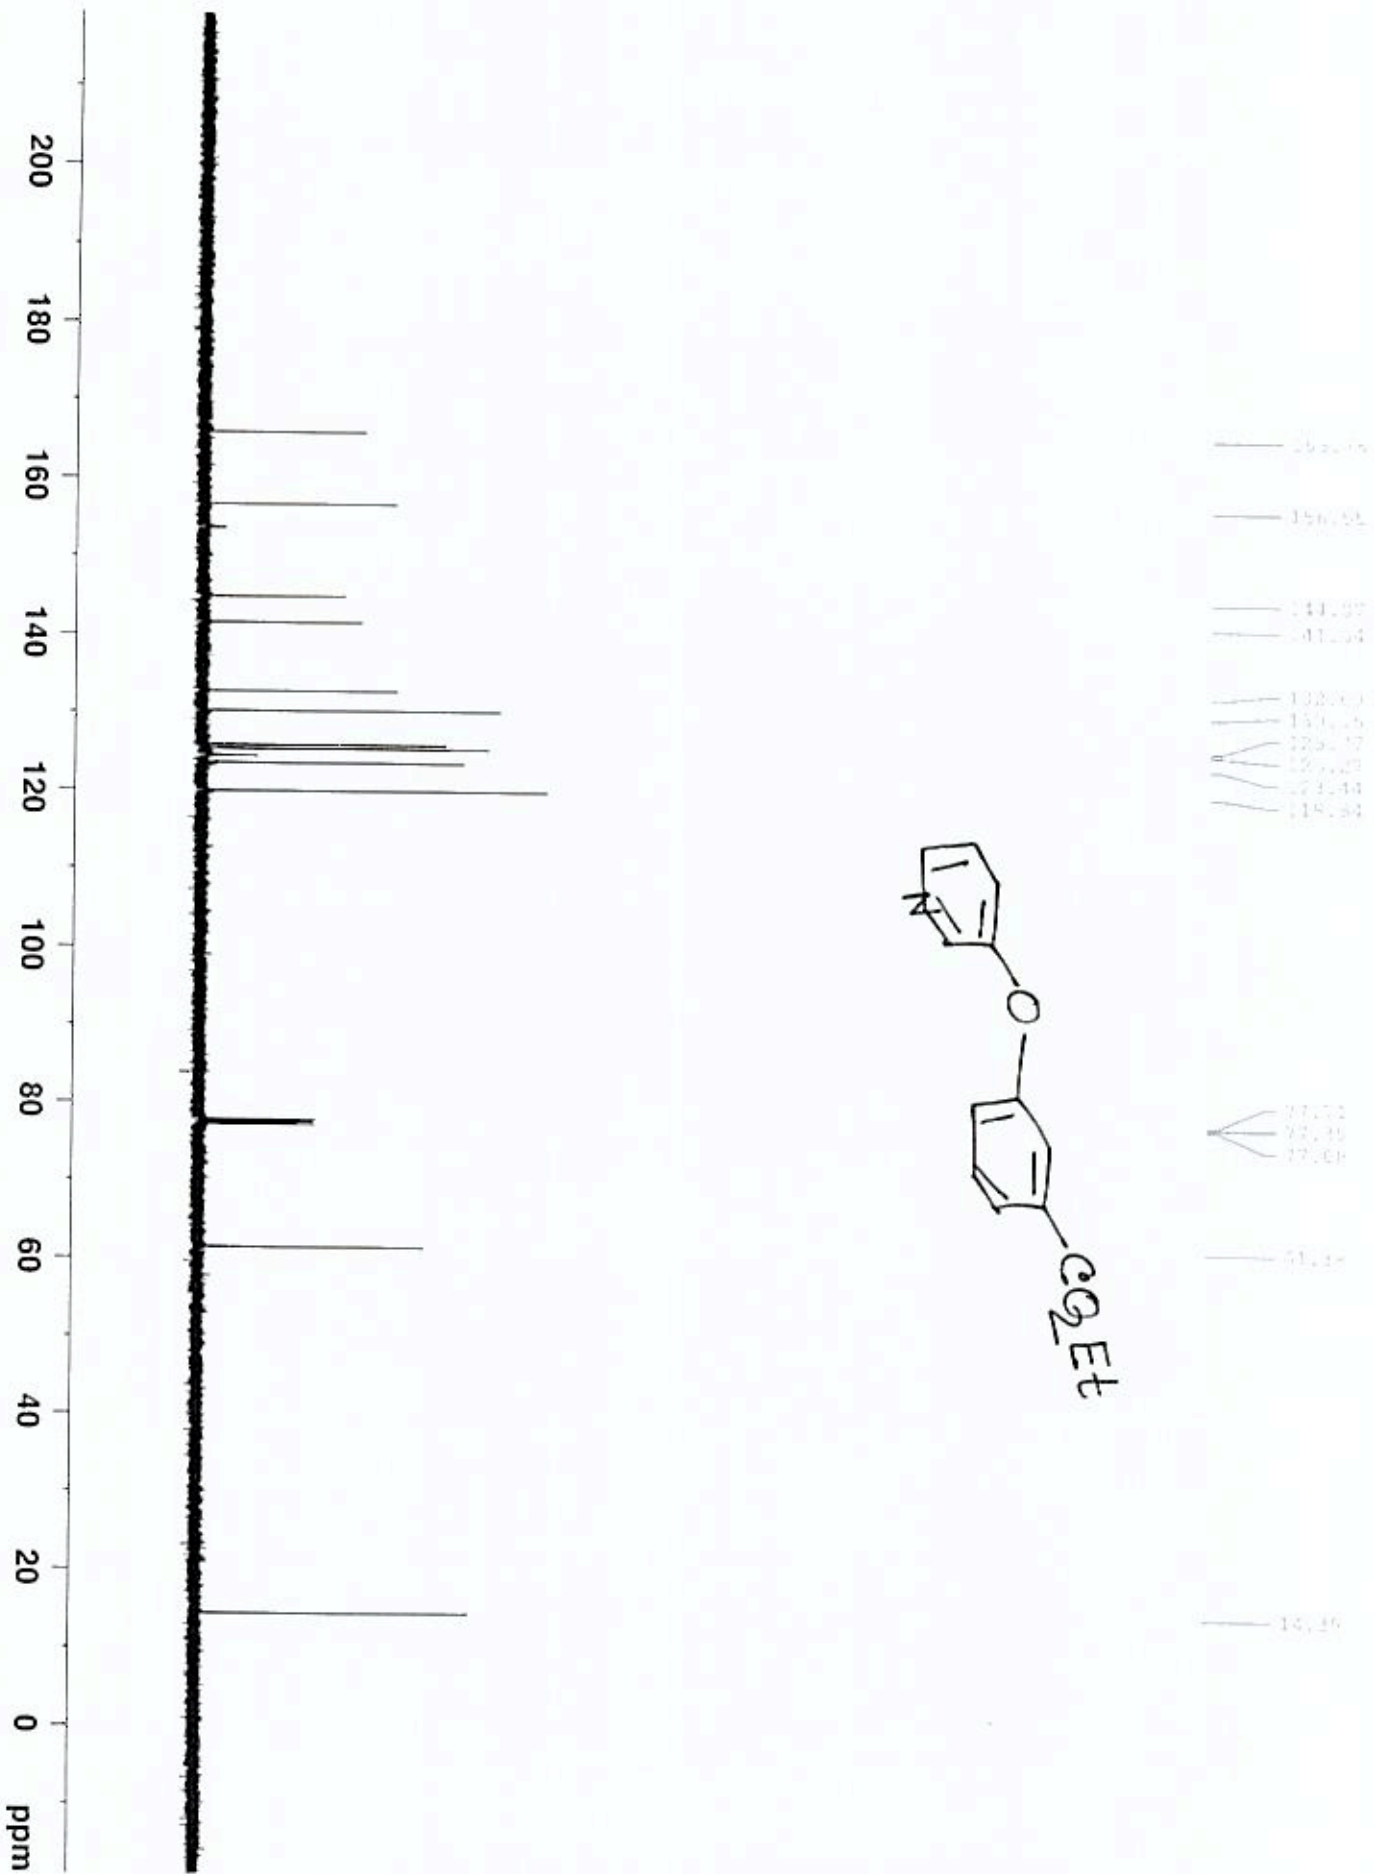

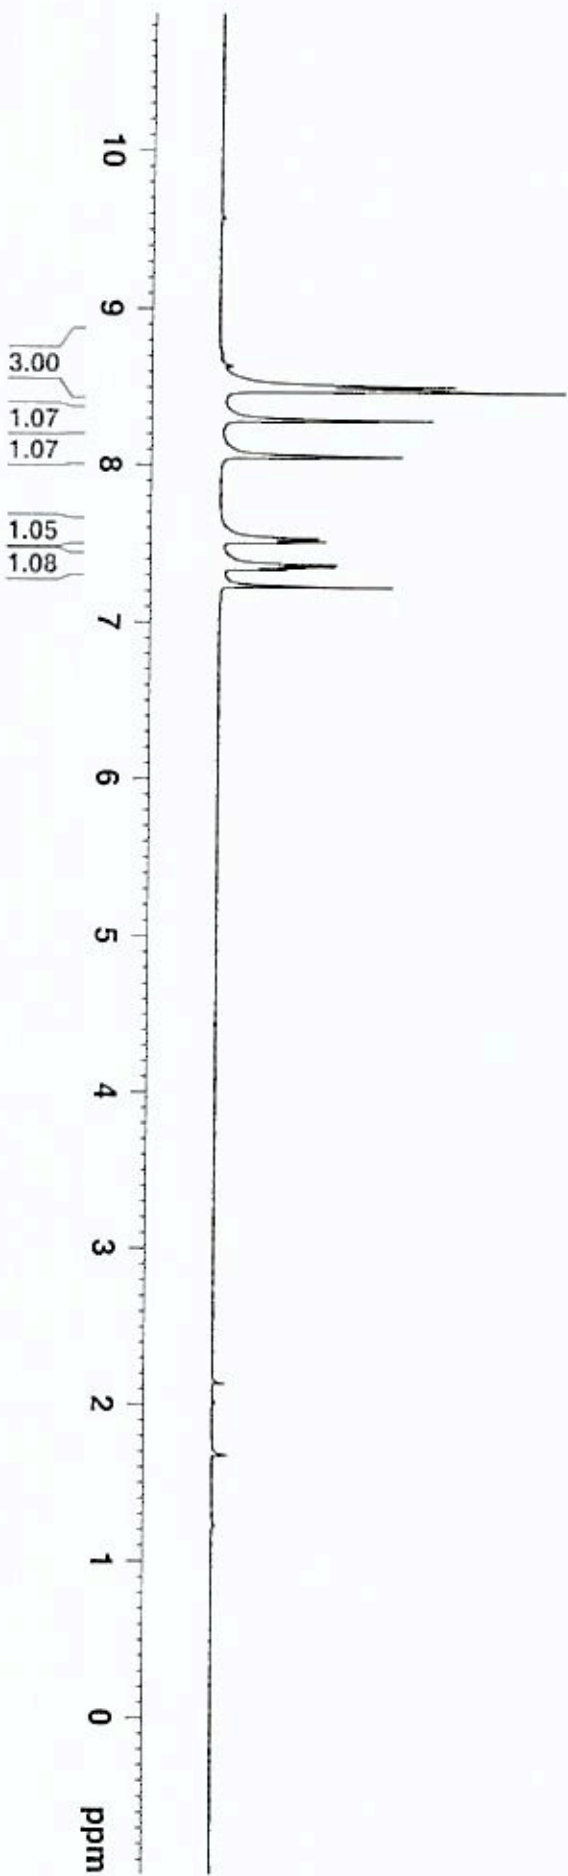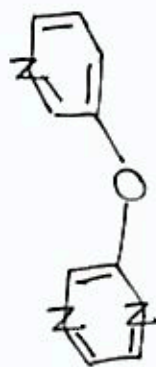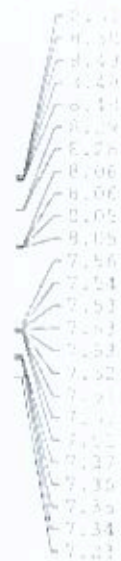

200 190 180 170 160 150 140 130 120 110 100 90 80 70 60 50 40 30 20 10 ppm

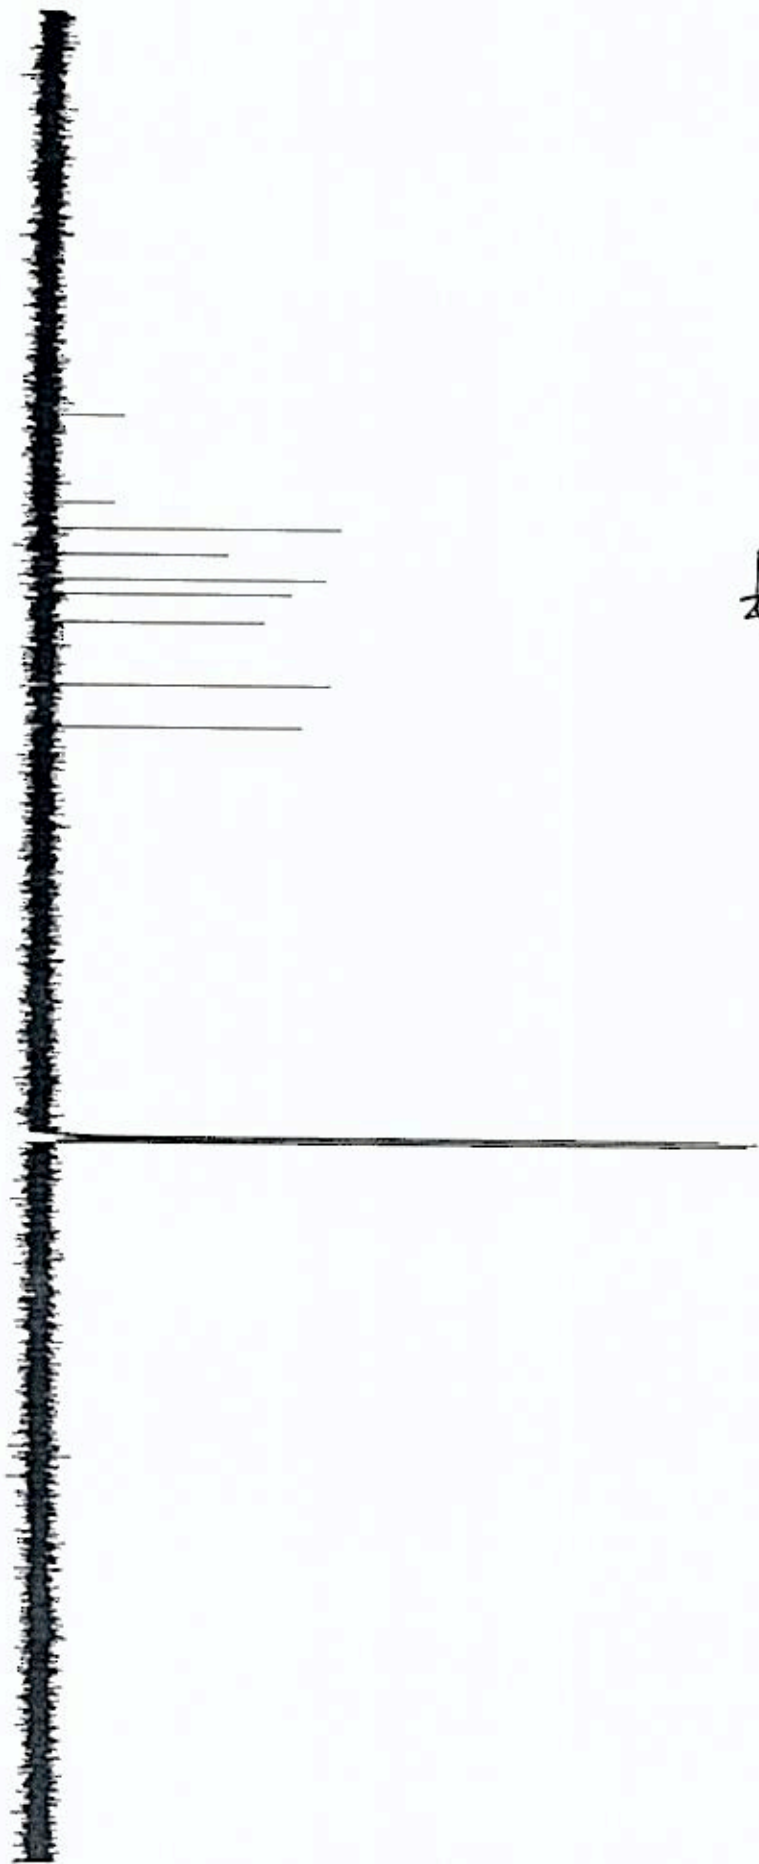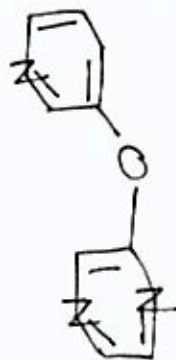

- 153.47
- 149.51
- 149.36
- 141.36
- 140.82
- 139.39
- 138.01
- 128.06
- 124.09

- 77.47
- 77.00
- 76.73

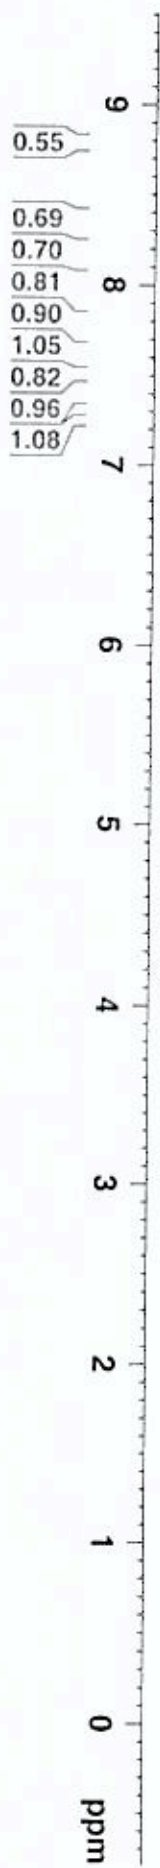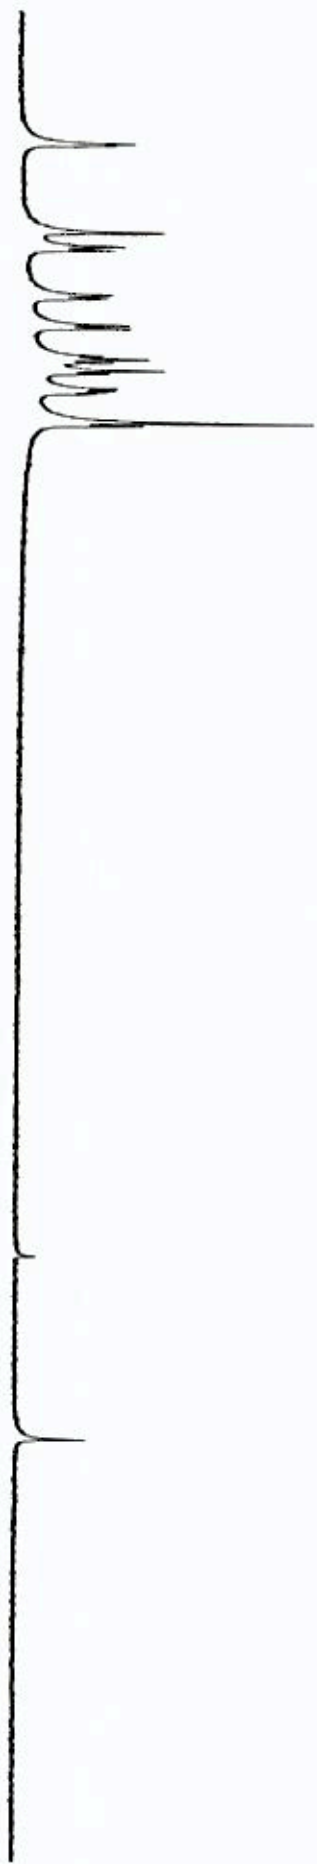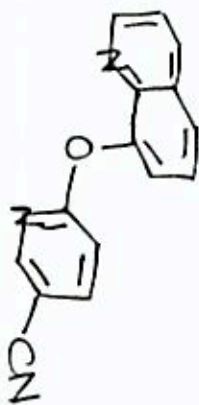

~ ~ ~ ~ ~

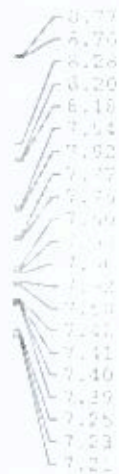

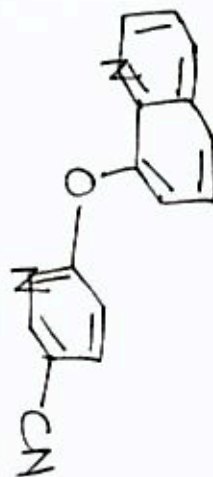

|        |
|--------|
| 183.57 |
| 158.14 |
| 156.81 |
| 149.16 |
| 143.94 |
| 141.35 |
| 135.42 |
| 133.88 |
| 129.71 |
| 128.25 |
| 127.35 |
| 121.96 |
| 117.05 |
| 112.15 |
| 104.73 |
| 77.06  |
| 77.00  |
| 77.02  |

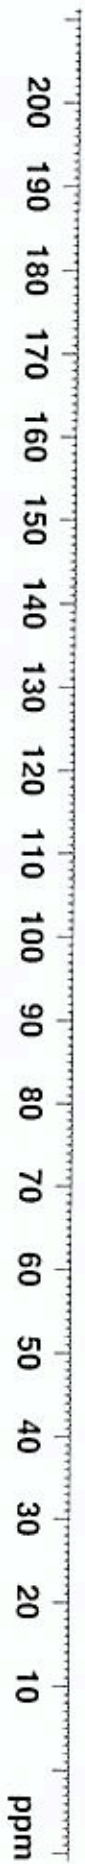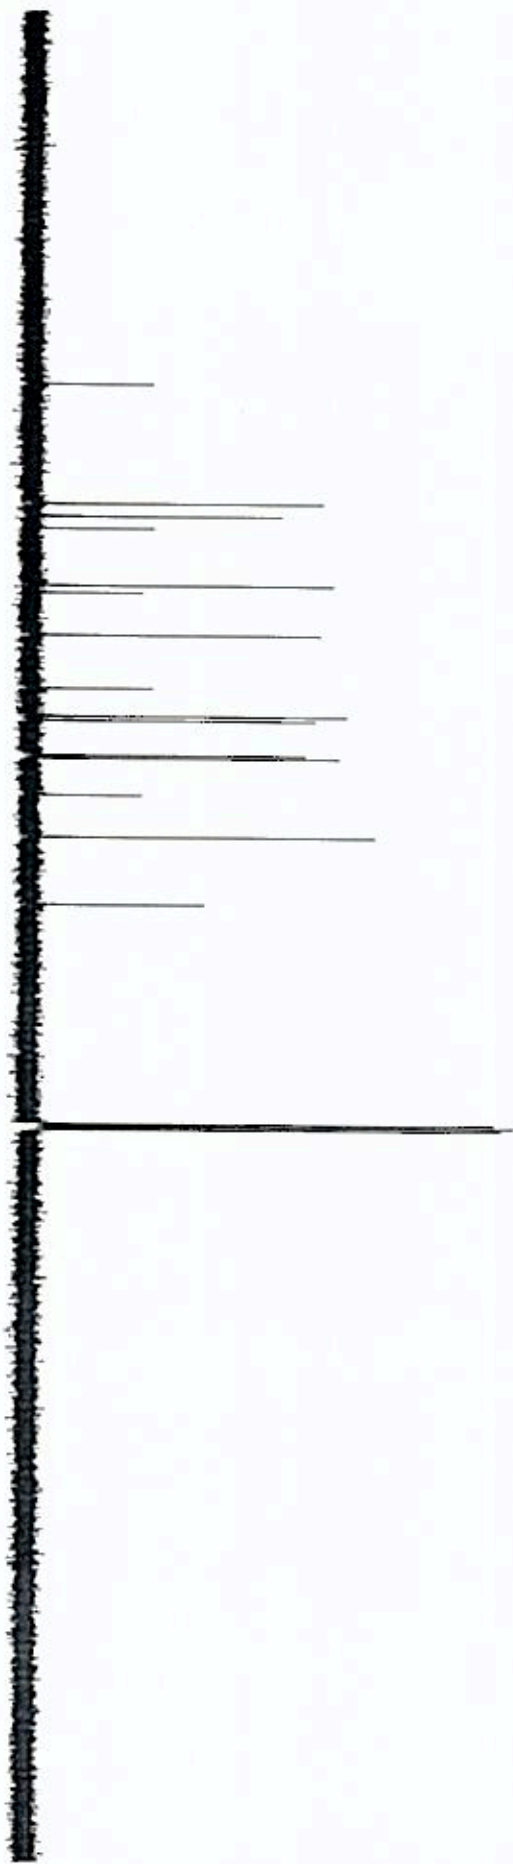

Supplement: NIHMS177989-supplement-2_si_002.pdf [file NIHMS177989-supplement-2_si_002.pdf]
